1 **Characterisation of *Trichuris muris* secreted proteins and extracellular vesicles**  
2 **provides new insights into host-parasite communication**

3 Ramon M. Eichenberger<sup>a\*</sup>, Md Hasanuzzaman Talukder<sup>b\*</sup>, Matthew A. Field<sup>a</sup>, Phurpa  
4 Wangchuk<sup>a</sup>, Paul Giacomini<sup>a</sup>, Alex Loukas<sup>a#</sup>, Javier Sotillo<sup>a#</sup>

5  
6 <sup>a</sup>*Centre for Biodiscovery and Molecular Development of Therapeutics, Australian*  
7 *Institute of Tropical Health and Medicine, James Cook University, Cairns, QLD,*  
8 *Australia.*

9 <sup>b</sup>*Faculty of Veterinary Sciences, Bangladesh Agricultural University, Mymensingh-*  
10 *2202, Bangladesh*

11  
12  
13  
14 \* Both authors equally contributed to the manuscript

15 # Corresponding Authors:

16 Javier Sotillo. Centre for Biodiscovery and Molecular Development of  
17 Therapeutics, James Cook University, Cairns, 4878, Queensland, Australia. Email:  
18 [javier.sotillo@jcu.edu.au](mailto:javier.sotillo@jcu.edu.au)

19 Prof. Alex Loukas. Centre for Biodiscovery and Molecular Development of  
20 Therapeutics, James Cook University, Cairns, 4878, Queensland, Australia. Email:  
21 [alex.loukas@jcu.edu.au](mailto:alex.loukas@jcu.edu.au)

22  
23 Running title: Extracellular vesicles from *Trichuris muris*

24 [Word count: 9,845](#)

25

## 26    **Abstract**

27            Whipworms are parasitic nematodes that live in the gut of more than 500  
 28 million people worldwide. Due to the difficulty in obtaining parasite material, the  
 29 mouse whipworm *Trichuris muris* has been extensively used as a model to study  
 30 human whipworm infections. These nematodes secrete a multitude of compounds that  
 31 interact with host tissues where they orchestrate a parasitic existence. Herein we  
 32 provide the first comprehensive characterisation of the excretory/secretory products of  
 33 *T. muris*. We identify 148 proteins secreted by *T. muris* and show for the first time  
 34 that the mouse whipworm secretes exosome-like extracellular vesicles (EVs) that can  
 35 interact with host cells. We use an Optiprep® gradient to purify the EVs, highlighting  
 36 the suitability of this method for purifying EVs secreted by a parasitic nematode. We  
 37 also characterise the proteomic and genomic content of the EVs, identifying >100  
 38 proteins, 56 miRNAs (22 novel) and 475 full-length mRNA transcripts mapping to *T.*  
 39 *muris* gene models. Many of the miRNAs putatively mapped to mouse genes involved  
 40 in regulation of inflammation, implying a role in parasite-driven immunomodulation.  
 41 In addition, for the first time to our knowledge, we use colonic organoids to  
 42 demonstrate the internalisation of parasite EVs by host cells. Understanding how  
 43 parasites interact with their host is crucial to develop new control measures. This first  
 44 characterisation of the proteins and EVs secreted by *T. muris* provides important  
 45 information on whipworm-host communication and forms the basis for future studies.

46

47    **Keywords:** extracellular vesicles, exosomes, *Trichuris muris*, whipworm, miRNA,  
 48 proteomics, organoids

49

50

# 51 1. Introduction

52 Infections with soil-transmitted helminths (STH) affect more than 1.5 billion  
53 people worldwide, causing great socio-economic impact as well as physical and  
54 intellectual retardation [1]. Among the STH, hookworms (*Necator americanus* and  
55 *Ancylostoma duodenale*), roundworms (*Ascaris lumbricoides*) and whipworms  
56 (*Trichuris trichiura*) are of particular importance due to their high prevalence and  
57 disease burden in impoverished countries [2]. For instance, *T. trichiura* alone infects  
58 around 500 million people worldwide, and contributes to 638,000 years of life lived  
59 with disability (YLDs) [2].

60 Infection with *Trichuris* spp. occurs after ingestion of infective eggs, which  
61 hatch in the caecum of the host. Larvae penetrate the mucosal tissue where they moult  
62 to become adult worms and reside for the rest of their lives. Due to the difficulty in  
63 obtaining parasite material to study whipworm infections, particularly adult worms,  
64 the rodent whipworm, *Trichuris muris*, has been extensively used as a tractable model  
65 of human trichuriasis [3, 4, 5]. In addition to parasitologists, immunologists have also  
66 benefited from the study of *T. muris* infections, and a significant amount of basic  
67 immunology research has been conducted using this model (reviewed by [6]). For  
68 instance, the role of IL-13 in resistance to nematode infections was elucidated using  
69 *T. muris* [7].

70 The recent publication of the genome and transcriptome of *T. muris* has  
71 provided meaningful insights into the immunobiology of whipworm infections [8].  
72 This work provided new information on potential drug targets against trichuriasis and  
73 elucidated important traits that drive chronicity. Despite this progress, and the  
74 tractability of the *T. muris* model, very few proteomic studies have been conducted,  
75 and only a handful of reports have described proteins secreted by *Trichuris* spp. [9,

10, 11, 12, 13, 14]. Drake *et al.* characterised a pore-forming protein that *T. muris* [14] and *T. trichiura* [13] use to drill holes in the host cell membrane. Furthermore, it has been suggested that a thioredoxin-like protein secreted by the pig whipworm *Trichuris suis* plays a role in mucosal homeostasis [11].

The importance of excretory/secretory (ES) products in governing host-parasite interactions and ensuring parasite survival in inhospitable environments is indisputable. Traditionally, ES products were believed to contain only soluble proteins, lipids, carbohydrates and genomic content; however, the recent discovery of extracellular vesicles (EVs) secreted by helminths has revealed a new paradigm in the study of host-parasite relationships [15, 16, 17]. Helminth EVs have immunomodulatory effects and contribute to pathogenesis. For instance, EVs secreted by parasitic flatworms can promote tumorigenesis [18] and polarise host macrophages towards a M1 phenotype [19], while EVs from the gastrointestinal nematode *Heligmosomoides polygyrus* contain small RNAs that can modulate host innate immunity [20].

In the present study we aim to characterise the factors involved in *T. muris*-host relationships. We provide the first proteomic analysis of the soluble proteins present in the ES products and we describe the proteomic and nucleic acid content of EVs secreted by whipworms. This work provides important information on whipworm biology and contributes to the development of new strategies and targets to combat nematode infections in humans and animals.

## 2. Experimental procedures

### 2.1 Ethics statement

100 The study was approved by the James Cook University (JCU) Animal Ethics  
101 Committee (A2213). Mice were maintained at the JCU animal house (Cairns campus)  
102 under normal conditions of regulated temperature (22°C) and lighting (12 h light/dark  
103 cycle) with free access to pelleted food and water. The mice were kept in cages in  
104 compliance with the Australian Code of Practice for the Care and Use of Animals for  
105 Scientific Purposes.

106

## 107 *2.2 Parasite material, isolation of ES products, and EV purification*

108 Parasites were obtained from genetically susceptible B10.BR mice infected  
109 with 200 *T. muris* eggs. Adult worms were harvested from the caecum of infected  
110 mice 5 weeks after infection, washed in PBS containing 5× antibiotic/antimycotic  
111 (AA) and cultured for 5 days in RPMI containing 1× AA, at 37°C and 5% CO<sub>2</sub>. The  
112 media obtained during the first 4 h after parasite culturing was discarded for further  
113 analysis. Dead worms were removed and ES products were collected daily, subjected  
114 to sequential differential centrifugation at 500 g, 2000 g and 4000 g for 30 min each  
115 to remove eggs and parasite debris. For the isolation of ES products, media was  
116 concentrated using a 10 kDa spin concentrator (Merck Millipore, USA) and stored at  
117 1.0 mg/ml in PBS at -80°C until required.

118 For the isolation of EVs, the media obtained after differential centrifugation  
119 was processed as described previously [21]. Briefly, ES products were concentrated  
120 using a 10 kDa spin concentrator, followed by centrifugation for 45 min at 12,000 g to  
121 remove larger vesicles. A MLS-50 rotor (Beckman Coulter, USA) was used to  
122 ultracentrifuge the supernatant for 3 h at 120,000 g and the resultant pellet was  
123 resuspended in 70 µl of PBS and subjected to Optiprep® discontinuous gradient  
124 (ODG) separation. One mL of 40%, 20%, 10% and 5% iodixanol solutions prepared

125 in 0.25 M sucrose, 10 mM Tris-HCl, pH 7.2, was layered in decreasing density in an  
126 ultracentrifuge tube, and the 70 µl containing the resuspended EVs was added to the  
127 top layer and ultracentrifuged at 120,000 g for 18 h at 4°C. Seventy (70) µl of PBS  
128 was added to the control tube prepared as described above. A total of 12 fractions  
129 were recovered from the ODG, and the excess Optiprep® solution was removed by  
130 buffer exchanging with 8 ml of PBS containing 1× EDTA-free protease inhibitor  
131 cocktail (Santa Cruz, USA) using a 10 kDa spin concentrator. The absorbance (340  
132 nm) was measured in each of the fractions and density was calculated using a standard  
133 curve with known standards. The protein concentration of all fractions was measured  
134 using a Pierce BCA Protein Assay Kit (ThermoFischer, USA). All fractions were kept  
135 at -80°C until use.

136

### 137 *2.3 Size and concentration analysis of EVs.*

138 The size distribution and particle concentration of fractions recovered after  
139 ODG were measured using tunable resistive pulse sensing (TRPS) by qNano (Izon,  
140 USA) following the manufacturer's instructions. Voltage and pressure values were set  
141 to optimize the signal to ensure high sensitivity. A nanopore NP100 was used for all  
142 fractions analysed except for fraction 9, where a NP150 was used. Calibration was  
143 performed using CP100 carboxylated polystyrene calibration particles (Izon) at a  
144 1:1000 dilution. Samples were diluted 1:5 and applied to the nanopore. The size and  
145 concentration of particles were determined using the software provided by Izon  
146 (version 3.2).

147

### 148 *2.4 Exosome uptake in murine colonic organoids (mini-guts)*

149 Murine colonic organoids were produced from intestinal crypts of a female  
150 C57 Bl6/J mouse according to previous reports [22] with some modifications. Briefly,  
151 murine colonic crypts were dissociated with Gentle Cell Dissociation reagent  
152 (Stemcell Technology Inc., Canada) and further incubated in trypsin (Gibco,  
153 ThermoFischer). Approximately 500 crypts were seeded in 50  $\mu$ l of Matrigel  
154 (Corning, USA) in a 24-well plate and cultured in Intesticult Organoid Growth  
155 Medium (Stemcell Technology Inc.) supplemented with 100 ng/ml murine  
156 recombinant Wnt3a (Peprotech, USA). ROCK-inhibitor (10  $\mu$ M Y-27632; Sigma-  
157 Aldrich, USA) was included in the culture medium for the first 2 days to avoid  
158 anoikis.

159 For imaging, organoids were seeded in 75  $\mu$ l of Matrigel in 6-well plates and  
160 cultured for 7 days. To investigate internalization of EVs in the colonic epithelium  
161 layer, EVs were labelled with PKH26 (Sigma-Aldrich) according to the  
162 manufacturer's instructions. A total of 15-30 million stained particles (based on the  
163 TRPS results) in 3-5  $\mu$ l were injected into the central lumen of individual organoids  
164 and cultured for 3 hours at 37°C and 4°C, respectively. Cell culture medium was  
165 removed, and wells were washed with PBS. Organoids were fixed by directly adding  
166 4% paraformaldehyde to the 6-well plates and incubating for 30 min at room  
167 temperature (RT). Matrigel was then mechanically disrupted, and cells were  
168 transferred into BSA-coated tubes. Autofluorescence was quenched by incubating the  
169 organoids with 50 mM NH<sub>4</sub>Cl in PBS (for 30 min at RT) and 100 mM glycine in PBS  
170 (for 5 min). Cell nuclei were stained with Hoechst dye (Invitrogen, US) and  
171 visualized using an AxioImager M1 ApoTome fluorescence microscope (Zeiss,  
172 Germany). Fluorescence intensity of PKH26-stained parasite EVs was quantified in  
173 ImageJ and expressed as percentage of corrected total fluorescence (% CTF) adjusted

174 by background fluorescence and the surveyed area in total epithelial cells (donut-  
175 shaped selection) or in the lumen incubated at different conditions in 10 different  
176 murine colonic organoids from 2 technical replicates (5 each).

177

## 178 2.5 Proteomic analyses

179 The protein content from the *T. muris* ES products and ODG fractions were  
180 analysed as follows.

### 181 2.5.1 Proteomic analysis of ES products

182 One hundred micrograms (100 µg) of *T. muris* ES proteins from two different  
183 batches of adult worms were precipitated at -20°C overnight in ice-cold methanol.  
184 Proteins were resuspended in 50 mM NH<sub>4</sub>HCO<sub>3</sub>, reduced in 20 mM dithiothreitol  
185 (DTT, Sigma-Aldrich) and finally alkylated in 55 mM iodoacetamide (IAM, Sigma-  
186 Aldrich). Proteins were finally digested with 2 µg of trypsin (Sigma-Aldrich) by  
187 incubating for 16 h at 37°C with gentle agitation. Reaction was stopped with 5%  
188 formic acid and the sample was desalted using ZipTip® (Merck Millipore). Both  
189 samples were kept at -80°C until use.

190

### 191 2.5.2 Proteomic analysis of the ODG fractions

192 For the proteomic analysis of ODG fractions, a total of 3 µg of protein from  
193 each ODG fraction was loaded on a 12% SDS-PAGE and electrophoresed at 100V for  
194 1.5 h. The gel was stained using the Pierce Silver Staining Kit for Mass Spectrometry  
195 (ThermoFischer) as per manufacturer's instructions. Each lane was sliced into 4  
196 pieces, which were subjected to trypsin digestion as described previously [23].  
197 Briefly, each slice was washed for 5 min three times in 50% acetonitrile, 25 mM  
198 NH<sub>4</sub>CO<sub>3</sub> and then dried under a vacuum centrifuge. Reduction was carried out in 20



199 mM DTT for 1 h at 65 °C, after which the supernatant was removed. Samples were  
200 then alkylated in 55 mM IAM at RT in darkness for 40 min. Gel slices were then  
201 washed 3× in 25 mM NH<sub>4</sub>CO<sub>3</sub> before drying in a vacuum centrifuge followed by  
202 digestion with 500 ng of trypsin (Sigma-Aldrich) overnight at 37°C. The digest  
203 supernatant was removed from the gel slices, and residual peptides were removed  
204 from the gel slices by washing three times with 0.1% TFA for 45 min at 37°C.  
205 Samples were desalted and concentrated using Zip-Tip® and kept at -80°C until use.

206

#### 207 2.5.2. Mass spectrometry and database searches

208 For all analyses, samples were reconstituted in 10 µl of 5% formic acid. Six  
209 microlitres of sample was injected onto a 50 mm 300 µm C18 trap column (Agilent  
210 Technologies, USA) and desalted for 5 min at 30 µL/min using 0.1% formic acid (aq).  
211 Peptides were then eluted onto an analytical nano HPLC column (150 mm x 75 µm  
212 300SBC18, 3.5 µm, Agilent Technologies) at a flow rate of 300 nL/min and separated  
213 using a 35 min gradient of 1-40% buffer B (90/10 acetonitrile/ 0.1% formic acid)  
214 followed by a steeper gradient from 40-80% buffer B in 5 min. The mass  
215 spectrometer operated in information-dependent acquisition mode (IDA), in which a  
216 1-s TOF MS scan from 350-1400 m/z was performed, and for product ion ms/ms 80-  
217 1400 m/z ions observed in the TOF-MS scan exceeding a threshold of 100 counts and  
218 a charge state of +2 to +5 were set to trigger the acquisition of product ion. Analyst  
219 1.6.1 (ABSCIEX) software was used for data acquisition and analysis.

220 A database was built using the *T. muris* genome [8] with the common  
221 repository of adventitious proteins (cRAP, <http://www.thegpm.org/crap/>) appended to  
222 it. Database search was performed using X!Tandem, MS-GF+, OMSSA and Tide  
223 search engines using SearchGUI [24]. Parameters were set as follows: tryptic

specificity allowing two missed cleavages, MS tolerance of 50 ppm and 0.2 Da tolerance for MS/MS ions. Carbamidomethylation of Cys was used as fixed modification and oxidation of Met and deamidation of Asn and Gln as variable modifications. PeptideShaker v.1.14.1 was used to import the results for peptide and protein inference [25]. Only proteins with a false discovery rate <1% having at least two unique peptides (containing at least seven amino acid residues) were considered as positively identified.

231

## 2.6. RNA analyses

### 2.6.1. mRNA and miRNA isolation

Two different biological replicates of EVs obtained from two different batches of worms were used. ODG fractions with a density between 1.06 and 1.08 (fractions containing pure EV samples after TRPS analysis) were pooled and excess Optiprep® solution was removed by buffer exchanging. Total RNA and miRNA were extracted using the mirVana™ miRNA Isolation Kit (ThermoFischer) according to the manufacturer's instructions. RNA was eluted over two fractions of 50 µl each and stored at -80°C until analysed.

241

### 2.6.2. RNA sequencing and transcript annotation

The RNA quality, yield, and size of total and small RNAs were analyzed using capillary electrophoresis (Agilent 2100 Bioanalyzer, Agilent Technologies, USA). Ribosomal RNA was removed from samples, which were pooled for sufficient input material for further sequencing, resulting in one sample for mRNA and two samples for miRNA analyses, respectively. mRNA and miRNA were prepared for sequencing using Illumina TruSeq stranded mRNA-seq and Illumina TruSeq Small RNA-seq

library preparation kit according to the manufacturer's instructions, respectively. RNAseq was performed on a HiSeq 500 (Illumina, single-end 75-bp PE mid output run, approx. 30M reads per sample). Quality control, library preparation and sequencing were performed at the Ramaciotti Centre for Genomics at the University of New South Wales.

## 2.7 Bioinformatic analyses

### 2.7.1 Proteomics

Proteins were classified according to Gene Ontology (GO) categories using the software Blast2GO basic version 4.0.7. [26] and Pfam using HMMER v3.1b1 [27]. Putative signal peptides and transmembrane domain(s) were predicted using the programs CD-Search tool [28] and SignalP [29].

### 2.7.2. mRNA analysis

High-throughput RNA-seq data was aligned to the *T. muris* reference genome models (WormBase WS255; <http://parasite.wormbase.org>; [30]) using the STAR transcriptome aligner [31]. Prior to downstream analysis, rRNA-like sequences were removed from the metatranscriptomic dataset using riboPicker-0.4.3 (<http://ribopicker.sourceforge.net>; [32]). BLASTn algorithm [33] was used to compare the non-redundant mRNA dataset for *T. muris* EVs to the nucleotide sequence collection (nt) from NCBI ([www.ncbi.nlm.nih.gov](http://www.ncbi.nlm.nih.gov)) to identify putative homologues in a range of other organisms (cut-off: <1E-03). Corresponding hits homologous to the murine host, with a transcriptional alignment coverage <95% (based on the effective transcript length divided by length of the gene), and with an expression level <10 fragments per kilobase of exon model per million mapped reads

(FPKM) normalized by the length of the gene, were removed from the list. The final list of mRNA transcripts from *T. muris* exosomes was assigned to protein families (Pfam) and GO categories (Blast2GO).

277

### 278 2.7.3. miRNA analysis and target prediction

279 The miRDeep2 package [34] was used to identify known and putative novel miRNAs  
280 present in both miRNA samples. As there are no *T. muris* miRNAs available in  
281 miRBase release 21 [35], the miRNAs from the nematodes *Ascaris suum*, *Brugia*  
282 *malayi*, *Caenorhabditis elegans*, *Caenorhabditis brenneri*, *Caenorhabditis briggsae*,  
283 *Caenorhabditis remanei*, *Haemonchus contortus*, *Pristionchus pacificus*, *Panagrellus*  
284 *redivivus*, and *Strongyloides ratti* were utilised as a training set for the algorithm.  
285 Only miRNA sequences commonly identified in both replicates were included for  
286 further analyses. The interaction between miRNA and murine host genes was  
287 predicted using the miRanda algorithm 3.3a [36]. Input 3'UTR from the *Mus*  
288 *musculus* GRCm38.p4 assembly was retrieved from the Ensembl database release 86  
289 [37]. The software was run with strict 5' seed pairing, energy threshold of -20  
290 kcal/mol and default settings for gap open and gap extend penalties. Interacting hits  
291 were filtered by conservative cut-off values for pairing score (>155) and matches  
292 (>80%). The resulting gene list was classified by the Panther classification system  
293 (<http://pantherdb.org/>) using pathway classification [38] and curated by the reactome  
294 pathway database ([www.reactome.org](http://www.reactome.org)) [39].

295

## 296 3. Results

### 297 3.1 Proteomics analysis of the ES products of *T. muris*

298           The ES products secreted by two different batches of *T. muris* adult worms  
299       were analysed using LC-MS/MS. A total of 1,777 and 2,056 peptide-spectrum  
300       matches (PSMs) were confidently identified in the first and second biological  
301       replicates analysed respectively. Similarly, a total of 591 and 704, corresponding to  
302       197 and 233 proteins were identified with 100% confidence. After removing the  
303       proteins identified from only one peptide and the sequences belonging to the  
304       contaminants, 100 and 116 *T. muris* proteins were identified in both replicates. A total  
305       of 68 proteins were found in both replicates, whereas 32 and 48 proteins were  
306       uniquely found in replicate 1 and 2 respectively, resulting in 148 proteins in total  
307       (Supplementary Table 1).

308           The identified proteins were subjected to a Pfam and GO analysis. The most  
309       represented domains were “trypsin-like peptidase”, “thioredoxin-like” and  
310       “tetratricopeptide repeat domains”, with 21, 19 and 13 proteins containing these  
311       domains respectively (Figure 1A). The most abundant GO terms within the  
312       “molecular function” ontology were “protein binding”, “metal ion binding” and  
313       “nucleic acid” as well as “isomerase activity”, “oxidoreductase activity” and “serine-  
314       type peptidase activity” (Figure 1B). The GO terms within “biological process” and  
315       “cell component” (as well as the above mentioned “molecular function”) are detailed  
316       in Supplementary Table 1.

317           From the total of 148 proteins found in both replicates, only 62 had a signal  
318       peptide (Supplementary Table 2), which opened the possibility of other non-classical  
319       mechanisms of secretion of these proteins described in other helminths, such as EVs.

320

321       3.2 *T. muris* adult worms secrete exosome-like EVs that can be internalised by host  
322       cells

323 The ES products secreted by *T. muris* adult worms were concentrated and EVs  
 324 purified using Optiprep® gradient. The density of the 12 fractions recovered after  
 325 Optiprep® separation was measured, ranging from 1.04-1.27 g/ml (Table 1). All  
 326 fractions were subjected to TRPS analysis using a qNano system, but only fractions 4-  
 327 10 contained enough vesicles for the analysis (Figure 2). Fraction 6 (corresponding to  
 328 a density of 1.07 g/ml) contained the highest number of EVs ( $1.34 \times 10^{12}$   
 329 particles/ml), followed by fractions 7 (density = 1.08 g/ml; concentration =  $8.21 \times$   
 330  $10^{10}$  particles/ml) and fraction 5 (density = 1.07 g/ml; concentration =  $7.47 \times 10^{10}$ )  
 331 (Table 1). Protein concentration was measured in all fractions, and EV purity  
 332 determined as described previously [40] (Table 1). Fraction 6 had the purest EV  
 333 preparation ( $4.31 \times 10^{-9}$  particles/ $\mu$ g), followed by Fractions 7 and 5 ( $4.04 \times 10^{-8}$  and  
 334  $1.58 \times 10^{-8}$  particles/ $\mu$ g respectively) (Table 1). Furthermore, the vesicle size was  
 335 determined using the qNano system, and the results are summarised in Table 1.

336 Cellular uptake of membrane-stained *T. muris* EVs was demonstrated in  
 337 murine colonic organoids (Figure 3). Fluorescence micrographs after 3 hours of  
 338 culture present a cytoplasmic location of the stained EVs in some cells within the  
 339 donut-shaped epithelial layer, representing EV uptake at 37°C. The EVs appear to  
 340 cluster at the mucosal cell surface at 4°C, suggestive of a specific cell interaction  
 341 (Figure 3A, B). Three hours after EV injection into the central lumen, at 37°C, stained  
 342 vesicles could be traced within a small subset of epithelial organoid cells (mean  
 343 corrected total fluorescence intensity (CTF) +/-SD: 4.04 +/- 1.11), and CTF values  
 344 were significantly reduced ( $p < 0.001$ ) in the central lumen (0.59 +/- 0.41), whereas at  
 345 4°C, CTF values were 0.21 +/- 0.29 and 3.79 +/- 2.29 for the total epithelial organoid  
 346 cells and the central lumen, respectively (Figure 3C).

347

### 348 3.3 *T. muris* secreted EVs contain specific proteins

349 All 12 fractions after ODG were subjected to SDS-PAGE separation, each  
 350 lane cut into 4 slices and subjected to trypsin digestion followed by LC-MS/MS  
 351 analysis. The results obtained from fractions 5-7 (fractions containing the purest EV  
 352 samples) were combined and subjected to protein identification analysis. Although  
 353 fractions 4 and 8 contained a significant amount of EVs, they were not included in the  
 354 analysis to avoid potential contamination with soluble proteins. A total of 11,201  
 355 spectra corresponding to 1,100 peptides were identified. A total of 225 proteins  
 356 matching *T. muris*, *M. musculus* and common contaminants for the cRAP database  
 357 were identified (Supplementary Table 3), and, a final list of 103 and 15 proteins  
 358 corresponding to *T. muris* and *M. musculus* respectively was defined with proteins  
 359 identified with  $\geq 2$  unique peptides (Supplementary Table 4).

360 Among the identified proteins from *T. muris*, the most abundant proteins  
 361 based on the spectrum count were a poly-cysteine and histidine-tailed protein, several  
 362 sperm-coating protein (SCP)-like extracellular proteins, also called SCP/Tpx-  
 363 1/Ag5/PR-1/Sc7 domain containing proteins (SCP/TAPS), a glyceraldehyde-3-  
 364 phosphoate dehydrogenase and a fructose-bisphosphate aldolase. Strikingly,  
 365 tetraspanins which are abundant markers of exosomes, were absent from our dataset,  
 366 but other proteins typically found in EVs from helminths like enolase, 14-3-3, heat  
 367 shock protein (HSP) and glutathione-s-transferase were also identified in this study.  
 368 Furthermore, from the 103 identified proteins from *T. muris*, only 13 (12.6%)  
 369 contained a transmembrane domain, and 37 (35.9%) had a signal peptide. Despite  
 370 washing the worms extensively before culturing, discarding the first 4 hours of the ES  
 371 for EV isolation (which typically contains a significant amount of host proteins) and  
 372 analysing only fractions containing highly pure EV samples, we found some host

373 proteins in our analysis. Among these proteins we found histones, keratins, albumin,  
374 antibodies and mucin-2 (Supplementary Table 4).

375 Following a GO analysis, the most represented GO terms within biological  
376 process in the *T. muris* EV proteins were assigned as “proteolysis”, “cellular protein  
377 metabolic process” and “oxidation-reduction process” (Figure 4A). Similarly, the  
378 most represented GO terms within molecular function were “protein binding”, “kinase  
379 activity” and serine-type endopeptidase activity” (Figure 4B).

380

### 381 3.4 *T. muris* secreted EVs contain specific mRNAs and miRNAs

382 RNA content of EVs was characterized using the Illumina HiSeq platform. For  
383 an initial description of parasite-specific mRNAs in EVs, total RNA from a highly  
384 pure EV sample was sequenced and results were curated based on stringent  
385 thresholds. This resulted in 475 full-length mRNA transcripts mapping to *T. muris*  
386 gene models. The identified hits were subjected to a Pfam and GO analysis.  
387 Interestingly, the most represented domains were of “unknown function”, “reverse  
388 transcriptase”, and “helicase”, whereas other gene models with DNA-binding and  
389 processing domains were also highly abundant (e.g. genes with “retrotransposon  
390 peptidase” domain) (Figure 5A). Mapping to molecular functions identified “protein  
391 binding” as the most abundant term, with 31.9% of all sequences involved in this  
392 function (Figure 5B). The underlying proteins from the parasite-specific mRNAs had  
393 functions in signalling and signal transduction, transport, protein modification and  
394 biosynthetic processes, as well as in RNA processing and DNA integration (Figure  
395 5C). Data is provided in Supplementary Table 5.

396 By sequencing and screening biological duplicates for miRNAs, we identified  
397 56 miRNAs commonly present in both datasets, with 34 having close homologs in



other nematodes. The remaining 22 miRNAs were novel and were named serially according to their mean abundances (tmu.miR.ev1 to tmu.miR.ev22). Potential interactions of *T. muris* miRNAs to murine host genes were explored by computational target prediction. The 56 nematode EV-miRNAs were predicted to interact with 2,043 3'UTR binding sites of the mouse genome assembly (Supplementary Table 6). Associated annotated coding genes were grouped according to signalling, metabolic, and disease pathways (Supplementary Figure 1). Indeed, a number of the nematode miRNA-mouse gene interactions are involved in host immune system, receptor, and transcriptional regulation (Figure 6). Within the 56 identified EV miRNAs, 3 (5.4%) could not be assigned for interaction with a specific pathway in the murine host, including the second most abundant asu-miR-5360-5p.

409

#### 4. Discussion

Trichuriasis is a soil transmitted helminth infection that affects almost 500 million people worldwide [1, 41, 42]. In addition to the pathogenicity associated with the disease, the infection can also cause physical and intellectual retardation [1, 43]. There is, therefore, an urgent need to understand the mechanisms by which the parasite interacts with its host such that novel approaches to combat this neglected tropical disease can be developed [44]. *T. trichiura* is the main species that affects humans, but the difficulty in obtaining worms and working with the adult stage have prompted parasitologists and immunologists to use the *T. muris* rodent model.

We provide herein the first high throughput study of the secretome of *T. muris*. The analysis of the genome from *T. muris* predicted 434 proteins containing signal peptides [8]. We have confidently identified (with 2 or more peptides) 148 proteins secreted by adult *T. muris*, corresponding to 34.1% of the total predicted

423 secreted proteins [8]). From the total proteins identified, 68 were commonly found in  
 424 both replicates, highlighting the importance of analysing multiple batches of samples  
 425 when conducting proteomics analyses of parasitic ES products. Among the identified  
 426 proteins we found several peptidases and proteases (such as serine proteases, pepsin  
 427 and trypsin domain-containing proteins) and also protease inhibitors including WAP  
 428 domain-containing proteins. These findings are in agreement with the functional  
 429 annotation of the *T. muris* proteins predicted from the genome [8]. Protease inhibitors  
 430 (particularly serine protease inhibitors and secretory leukocyte proteinase inhibitor  
 431 (SLPI)-like proteins - proteins containing mostly WAP domains) are abundantly  
 432 represented in the *T. muris* genome [8]. SLPI-like proteins have been suggested to  
 433 have immunomodulatory properties as well as a role in wound healing [8, 45, 46, 47],  
 434 so they could be secreted in an attempt to modulate the host's immune response and  
 435 repair damage caused by both feeding/migrating worms and immunopathogenesis. In  
 436 addition, we found five SCP/TAPS (also known as CAP-domain) proteins.  
 437 SCP/TAPS proteins are abundantly represented in soil-transmitted helminths,  
 438 although they have not been well characterised in the clade I nematodes [48].

439       Only recently, different authors have shown the importance of helminth-  
 440 secreted EVs in host-parasite interactions. The secretion of small EVs was  
 441 demonstrated in various intracellular and extracellular parasites, interacting with their  
 442 hosts in a specific manner (reviewed in [17]). In addition, the secretion of EVs has  
 443 been demonstrated thus far only in a small number of nematodes, including the free-  
 444 living *C. elegans*, the filarial nematodes *Brugia malayi* and *Dirofilaria immitis*, the  
 445 rodent nematode *Heligmosomoides polygyrus* and the ovine and porcine intestinal  
 446 nematodes *Teladorsagia circumcincta* and *Trichuris suis*, respectively [20, 49, 50, 51,  
 447 52].

Our results show that *T. muris* secretes EVs with a wide variety of sizes (40-550 nm). In order to study the exosome-like vesicles (vesicles with a size between 50-150 nm) and eliminate contamination with soluble proteins that could be co-precipitated in the ultracentrifugation step, we further purified the EVs using Optiprep and analysed only fractions 5-7 (fractions containing EVs with sizes between 72±23.8nm to 90±25.5nm). For a totally novel approach in EV research, we introduced and established a long-term primary *in vitro* culture to generate 3D intestinal organoids, recapitulating the *in vivo* epithelial tissue organisation and representing the complete census of progenitors (stem cells) and differentiated cells [22, 53]. Although there are colonic cancer cell lines available, such as the intestinal epithelial cell line Caco2, cell lines cannot recapitulate the complex spatial organisation of the intestinal epithelium, they have undergone significant molecular changes to become immortal, and do not represent all intestinal subsets [54]. Hence, we used colonic organoids corresponding to the epithelial barrier, which is the first line of defence against intestinal pathogens. We observed EV uptake only in a subset of the cells, which we have yet to characterise. Interestingly at 4°C (metabolically inactive state of the cells), the EVs seem to assemble and adhere to the luminal surface of the organoids, suggesting a specific cell interaction. A disadvantage of the intestinal organoid culture is the lack of any immune cells. Co-culture experiments with intestinal organoids and intraepithelial lymphocytes as described by Nozaki and colleagues [55] could be a powerful tool to study interactions of EVs with immune cells at their primary interface.

The proteomic analysis of the exosome-like EVs showed a total of 118 proteins (103 from *T. muris* and 15 from the host), 67 of which have been also found in the crude ES prep. From the common proteins, only 27 (40%) were predicted to

473 have a signal peptide, thus, EVs could be a potential mechanism by which these  
 474 proteins are secreted by helminths into the extracellular milieu, addressing an issue  
 475 that has been frequently debated in the literature [8]. It is interesting to note that no  
 476 tetraspanins were detected in the *T. muris* EVs. Tetraspanins are considered a  
 477 molecular marker of exosomes since they are present on the surface membrane of  
 478 EVs from many different organisms including mammalian cells and bacteria [56].  
 479 EVs secreted by, or shed from the surface of parasitic trematodes are enriched in  
 480 tetraspanins [18, 21, 57], but in the case of nematodes, only *H. polygyrus* has been  
 481 shown to secrete EVs containing tetraspanins, although only one member was found  
 482 [20]. However, the EVs from *H. polygyrus* were not purified after ultracentrifugation,  
 483 which makes it difficult to compare this protein dataset with our own from *T. muris*.  
 484 The *T. muris* genome contains 23 genes encoding for proteins with a tetraspanin  
 485 domain (domain E-value <0.05), which indicates that this family of proteins is present  
 486 in the parasite, although might not be important for exosome biogenesis in this group  
 487 of parasites. Since tetraspanins are also involved in the formation of the membrane of  
 488 EVs [56], it is unclear why EVs secreted by nematode parasites are not replete in  
 489 tetraspanins. Tetraspanins were also absent in the exosomes secreted by other  
 490 nematodes such as *B. malayi* and *T. circumcincta* [52, 58], which leads us to  
 491 hypothesize that in helminths, the presence of tetraspanins in exosome-like vesicles is  
 492 a hallmark of trematode flatworms but not of nematode roundworms. In trematodes,  
 493 exosomes derive from the tegumental syncytium of the worm [59], whereas in  
 494 nematodes they seem to have an intestinal origin [20]. This different origin could be  
 495 the reason why tetraspanins are not enriched in nematode EVs. Despite the absence of  
 496 tetraspanins, our dataset presents other proteins usually found in parasitic exosomes,  
 497 such as 14-3-3, enolase and myoglobin.

Proteins involved in proteolysis were abundantly represented (16.5% of sequences) in the *T. muris* EVs (e.g. trypsin like and pepsin proteins). *Trichuris* lacks the muscular pharynx that many other nematodes use to ingest their food, a challenging process given the hydrostatic pressure of the pseudocoelom that characterizes the phylum. Instead, it has been suggested that the parasite secretes copious quantities of digestive enzymes for this purpose [8]. We have shown that proteases are heavily represented in the ES products, and proteolysis is also the main GO term found when we analysed the proteins present in the EVs. Indeed, 10 of the 103 proteins from *T. muris* found in the EVs contain a trypsin domain. These proteins could be involved in extracellular digestion, and, since feeding is a key process in parasite biology, they might also be potential targets for vaccines and drugs against the parasite. Helminth proteases have also been hypothesized to be involved in immunomodulatory processes, where they degrade important immune cell surface receptors [60] and host intestinal mucins [9, 61]. If this is the case, *Trichuris* could be secreting EVs containing peptidases to promote an optimal environment for attaching to the mucosa and feeding purposes.

Proteins containing an SCP/TAPS domain were identified in the EVs secreted by *T. muris*. This family of proteins is abundantly expressed by parasitic nematodes and trematodes. For instance, they represent at least 28% of the ES products of the hookworm *Ancylostoma caninum*, and have been found in free-living and plant nematodes (reviewed by [62]). Their role is still unknown, although they have been suggested to play roles in fundamental biological processes such as larval penetration [63], modulation of the immune response [64, 65], in the transition from the free-living to the parasitic stage [66] and have even been explored as vaccine candidates against hookworm infections [67]. It is interesting to note that EVs from other

523 helminths are enriched for many known vaccine candidate antigens [21]. Since  
524 SCP/TAPS proteins are abundant in the EVs secreted by *T. muris*, their potential use  
525 as vaccines should be further explored.

526         The presence of contaminating host proteins in parasite EV preps is an  
527 unavoidable concern when the parasite developmental stage of interest can only be  
528 acquired from the host. We found 15 host (mouse) proteins in the *T. muris* EV preps.  
529 When we analysed the different fractions after Optiprep gradient using a proteomics  
530 approach, we found several differences depending on the proteins. For instance,  
531 albumin is present in fractions 1-8 except in fraction 6 (which is, interestingly, the  
532 fraction with the highest purity of EVs), which suggests that its presence could be due  
533 to a contamination after ultracentrifugation, a phenomenon initially identified from  
534 the mammalian exosome literature [68]. Similarly, mouse galectin-3 is present  
535 throughout the fractions except in fractions 4, 11 and 12, suggesting, again, that its  
536 presence could be due to co-precipitation (eg. binding to exosome surface glycans)  
537 during the ultracentrifugation step. Mucin-2 was only present in fractions 4-9, which  
538 are the fractions containing EVs (fractions 5-7 had the highest purity, but 4, 8 and 9  
539 were also found to contain EVs). Mucins have been shown to be key in maintaining  
540 the structure of EVs secreted by human tracheobronchial epithelial cells [69]. We  
541 therefore hypothesize that mouse mucin-2 binds to *T. muris* EV proteins such as  
542 galactoside-binding protein where it might facilitate initial binding of *T. muris* EVs to  
543 colonic epithelial cells, although further work is needed to confirm this theory.

544         We analysed the mRNA and miRNA content of the exosome-like EVs  
545 secreted by *T. muris* since it has been well documented that the nucleic acid content of  
546 eukaryotic EVs can be delivered between species to other cells, and can be functional  
547 in the new location [70]. Functional categorization of the 475 mRNAs from *T. muris*

EVs revealed a high proportion of protein-binding proteins. Interestingly, mRNAs for common EV proteins were present, including inter alia mRNAs for tetraspanins, HSPs, histones, ubiquitin-related proteins, and signalling- and vesicle trafficking molecules (rab, rho and ras). A significant number of domains found in the proteins predicted from mRNA sequences were involved in reverse transcription and retrotransposon activity, suggesting a strong involvement of these mRNAs in direct interactions with the host target cell genome. This is supported by the hypothesis of shared pathways between EV biogenesis and retrovirus budding, including the molecular composition of the released particles, sites of budding in different cell types, and the targeting signals that deliver proteins [71, 72, 73, 74].

To gain a more comprehensive picture of the RNA composition of the *T. muris* EVs, we sequenced the miRNAs present in *T. muris* EVs and identified 22 miRNAs, including 22 novel miRNAs without described homology to other nematodes. We also identified miRNAs that shared homology with those from other parasitic nematodes, such as let-7, miR-2, miR-9, miR-34, miR-36 (a and c), miR-44, miR-60, miR-72, miR-81, miR-86, miR-87, miR-92, miR-228, miR-236 and miR-252 (reviewed in [75]). This suggests that secretion of miRNAs by parasitic nematodes is most probably conserved and that EVs could be playing an important role in this secretory pathway. *T. muris* miRNAs that regulate expression of genes involved in specific conditions and cellular pathways were identified. In humans, more than 60% of all protein-coding genes are thought to be controlled by miRNAs (reviewed in [76]). Our *in silico* prediction analysis of murine host gene interactions of *T. muris* EV miRNAs points towards a strong involvement of parasite miRNAs in regulation/modulation of the host immune system [77]. In this sense, it has been previously demonstrated that small EVs secreted by *H. polygyrus* interact with

573 intestinal epithelial cells of its murine host and suppress type 2 innate immune  
574 responses, promoting parasite survival [20]. Similarly, other studies demonstrated the  
575 secretion of EVs containing miRNAs by larvae of the porcine whipworm *T. suis*, and  
576 although the miRNAs were not sequenced, the authors suggested a possible role in  
577 immune evasion [49].

578         The mechanisms by which parasitic helminths pack their nucleic acid cargo  
579 into EVs is still unknown, and, while we hypothesize that an active mechanism might  
580 regulate this process, we cannot discard the possibility that mRNAs and miRNAs  
581 could be internalised at random. Understanding this mechanism will be of importance  
582 in understanding the intimately interactive nature of host-parasite biology. For  
583 example, are mRNAs in parasite EVs translated into protein by target host cells, akin  
584 to viral hijacking of host cell protein manufacturing machinery? Or, are EV mRNAs  
585 unimportant, and manipulation of host cell gene expression is mostly due to miRNAs?

586         In the present study we have provided important information regarding the  
587 molecules secreted by the murine whipworm *T. muris*. The identification of the  
588 secreted proteins and EVs (including their proteomic and RNA content) will prove  
589 useful not only for the design of novel approaches aimed at controlling whipworm  
590 infections, but also to understand the way the parasite promotes an optimal  
591 environment for its survival.

592

## 593 **Funding**

594         This work was supported by a program grant from the National Health and  
595 Medical Research Council (NHMRC) [program grant number 1037304] and a  
596 Principal Research fellowship from NHMRC to AL. RME was supported by an Early  
597 Postdoc Mobility Fellowship (P2ZHP3\_161693) from the Swiss National Science



Foundation. MHT was supported by an Endeavour Research Fellowship. The funders had no role in study design, data collection and analysis, decision to publish, or preparation of the manuscript. The authors declare no competing financial interests.

601

## 602 **References**

603

- 604 1. Bethony J, Brooker S, Albonico M, Geiger SM, Loukas A, Diemert D, Hotez  
605 PJ. Soil-transmitted helminth infections: ascariasis, trichuriasis, and hookworm.  
606 Lancet. 2006;367:1521-32.
- 607 2. Pullan RL, Smith JL, Jasrasaria R, Brooker SJ. Global numbers of infection  
608 and disease burden of soil transmitted helminth infections in 2010. Parasit Vectors.  
609 2014;7:37.
- 610 3. Klementowicz JE, Travis MA, Grencis RK. *Trichuris muris*: a model of  
611 gastrointestinal parasite infection. Semin Immunopathol. 2012;34:815-28.
- 612 4. Cliffe LJ, Grencis RK. The *Trichuris muris* system: a paradigm of resistance  
613 and susceptibility to intestinal nematode infection. Adv Parasitol. 2004;57:255-307.
- 614 5. Bancroft AJ, Hayes KS, Grencis RK. Life on the edge: the balance between  
615 macrofauna, microflora and host immunity. Trends Parasitol. 2012;28:93-8.
- 616 6. Hurst RJ, Else KJ. *Trichuris muris* research revisited: a journey through time.  
617 Parasitology. 2013;140:1325-39.
- 618 7. Grencis RK, Bancroft AJ. Interleukin-13: a key mediator in resistance to  
619 gastrointestinal-dwelling nematode parasites. Clin Rev Allergy Immunol. 2004;26:51-  
620 60.
- 621 8. Foth BJ, Tsai IJ, Reid AJ, Bancroft AJ, Nichol S, Tracey A, Holroyd N,  
622 Cotton JA, Stanley EJ, Zarowiecki M, Liu JZ, Huckvale T, Cooper PJ, Grencis RK,  
623 Berriman M. Whipworm genome and dual-species transcriptome analyses provide

- 624 molecular insights into an intimate host-parasite interaction. Nat Genet. 2014;46:693-  
625 700.
- 626 9. Hasnain SZ, McGuckin MA, Grencis RK, Thornton DJ. Serine protease(s)  
627 secreted by the nematode *Trichuris muris* degrade the mucus barrier. PLoS Negl Trop  
628 Dis. 2012;6:e1856.
- 629 10. Laan LC, Williams AR, Stavenhagen K, Giera M, Kooij G, Vlasakov I, Kalay  
630 H, Kringel H, Nejsun P, Thamsborg SM, Wuhrer M, Dijkstra CD, Cummings RD,  
631 van Die I. The whipworm (*Trichuris suis*) secretes prostaglandin E2 to suppress  
632 proinflammatory properties in human dendritic cells. FASEB J. 2016.
- 633 11. Ditgen D, Anandarajah EM, Hansmann J, Winter D, Schramm G, Erttmann  
634 KD, Liebau E, Brattig NW. Multifunctional thioredoxin-like protein from the  
635 gastrointestinal parasitic nematodes *Strongyloides ratti* and *Trichuris suis* affects  
636 mucosal homeostasis. J Parasitol Res. 2016;2016:8421597.
- 637 12. Santos LN, Gallo MB, Silva ES, Figueiredo CA, Cooper PJ, Barreto ML,  
638 Loureiro S, Pontes-de-Carvalho LC, Alcantara-Neves NM. A proteomic approach to  
639 identify proteins from *Trichuris trichiura* extract with immunomodulatory effects.  
640 Parasite Immunol. 2013;35:188-93.
- 641 13. Drake LJ, Barker GC, Korchev Y, Lab M, Brooks H, Bundy DA. Molecular  
642 and functional characterization of a recombinant protein of *Trichuris trichiura*. Proc  
643 Biol Sci. 1998;265:1559-65.
- 644 14. Drake L, Korchev Y, Bashford L, Djamgoz M, Wakelin D, Ashall F, Bundy  
645 D. The major secreted product of the whipworm, *Trichuris*, is a pore-forming protein.  
646 Proc Biol Sci. 1994;257:255-61.
- 647 15. Marcilla A, Trelis M, Cortes A, Sotillo J, Cantalapiedra F, Minguez MT,  
648 Valero ML, Sanchez del Pino MM, Munoz-Antoli C, Toledo R, Bernal D.

- 649 Extracellular vesicles from parasitic helminths contain specific excretory/secretory  
650 proteins and are internalized in intestinal host cells. PLoS One. 2012;7:e45974.
- 651 16. Marcilla A, Martin-Jaular L, Trelis M, de Menezes-Neto A, Osuna A, Bernal  
652 D, Fernandez-Becerra C, Almeida IC, Del Portillo HA. Extracellular vesicles in  
653 parasitic diseases. J Extracell Vesicles. 2014;3:25040.
- 654 17. Coakley G, Maizels RM, Buck AH. Exosomes and other extracellular  
655 vesicles: the new communicators in parasite infections. Trends Parasitol.  
656 2015;31:477-89.
- 657 18. Chaityadet S, Sotillo J, Smout M, Cantacessi C, Jones MK, Johnson MS,  
658 Turnbull L, Whitchurch CB, Potriquet J, Laohaviroj M, Mulvenna J, Brindley PJ,  
659 Bethony JM, Laha T, Sripa B, Loukas A. Carcinogenic liver fluke secretes  
660 extracellular vesicles that promote cholangiocytes to adopt a tumorigenic phenotype. J  
661 Infect Dis. 2015;212:1636-45.
- 662 19. Wang L, Li Z, Shen J, Liu Z, Liang J, Wu X, Sun X, Wu Z. Exosome-like  
663 vesicles derived by *Schistosoma japonicum* adult worms mediates M1 type immune-  
664 activity of macrophage. Parasitol Res. 2015;114:1865-73.
- 665 20. Buck AH, Coakley G, Simbari F, McSorley HJ, Quintana JF, Le Bihan T,  
666 Kumar S, Abreu-Goodger C, Lear M, Harcus Y, Ceroni A, Babayan SA, Blaxter M,  
667 Ivens A, Maizels RM. Exosomes secreted by nematode parasites transfer small RNAs  
668 to mammalian cells and modulate innate immunity. Nat Commun. 2014;5:5488.
- 669 21. Sotillo J, Pearson M, Potriquet J, Becker L, Pickering D, Mulvenna J, Loukas  
670 A. Extracellular vesicles secreted by *Schistosoma mansoni* contain protein vaccine  
671 candidates. Int J Parasitol. 2016;46:1-5.
- 672 22. Sato T, Stange DE, Ferrante M, Vries RG, Van Es JH, Van den Brink S, Van  
673 Houdt WJ, Pronk A, Van Gorp J, Siersema PD, Clevers H. Long-term expansion of

674 epithelial organoids from human colon, adenoma, adenocarcinoma, and Barrett's  
675 epithelium. *Gastroenterology*. 2011;141:1762-72.

676 23. Sotillo J, Sanchez-Flores A, Cantacessi C, Harcus Y, Pickering D, Bouchery  
677 T, Camberis M, Tang SC, Giacomini P, Mulvenna J, Mitreva M, Berriman M, LeGros  
678 G, Maizels RM, Loukas A. Secreted proteomes of different developmental stages of  
679 the gastrointestinal nematode *Nippostrongylus brasiliensis*. *Mol Cell Proteomics*.  
680 2014;13:2736-51.

681 24. Vaudel M, Barsnes H, Berven FS, Sickmann A, Martens L. SearchGUI: An  
682 open-source graphical user interface for simultaneous OMSSA and X!Tandem  
683 searches. *Proteomics*. 2011;11:996-9.

684 25. Vaudel M, Burkhardt JM, Zahedi RP, Oveland E, Berven FS, Sickmann A,  
685 Martens L, Barsnes H. PeptideShaker enables reanalysis of MS-derived proteomics  
686 data sets. *Nat Biotechnol*. 2015;33:22-4.

687 26. Gotz S, Garcia-Gomez JM, Terol J, Williams TD, Nagaraj SH, Nueda MJ,  
688 Robles M, Talon M, Dopazo J, Conesa A. High-throughput functional annotation and  
689 data mining with the Blast2GO suite. *Nucleic Acids Res*. 2008;36:3420-35.

690 27. Finn RD, Clements J, Arndt W, Miller BL, Wheeler TJ, Schreiber F, Bateman  
691 A, Eddy SR. HMMER web server: 2015 update. *Nucleic Acids Res*. 2015;43:W30-8.

692 28. Marchler-Bauer A, Lu S, Anderson JB, Chitsaz F, Derbyshire MK, DeWeese-  
693 Scott C, Fong JH, Geer LY, Geer RC, Gonzales NR, Gwadz M, Hurwitz DI, Jackson  
694 JD, Ke Z, Lanczycki CJ, Lu F, Marchler GH, Mullokandov M, Omelchenko MV,  
695 Robertson CL, Song JS, Thanki N, Yamashita RA, Zhang D, Zhang N, Zheng C,  
696 Bryant SH. CDD: a Conserved Domain Database for the functional annotation of  
697 proteins. *Nucleic Acids Res*. 2011;39:D225-9.

- 698 29. Petersen TN, Brunak S, von Heijne G, Nielsen H. SignalP 4.0: discriminating  
699 signal peptides from transmembrane regions. *Nat Methods*. 2011;8:785-6.
- 700 30. Howe KL, Bolt BJ, Cain S, Chan J, Chen WJ, Davis P, Done J, Down T, Gao  
701 S, Grove C, Harris TW, Kishore R, Lee R, Lomax J, Li Y, Muller HM, Nakamura C,  
702 Nuin P, Paulini M, Raciti D, Schindelman G, Stanley E, Tuli MA, Van Auken K,  
703 Wang D, Wang X, Williams G, Wright A, Yook K, Berriman M, Kersey P, Schedl T,  
704 Stein L, Sternberg PW. WormBase 2016: expanding to enable helminth genomic  
705 research. *Nucleic Acids Res*. 2016;44:D774-80.
- 706 31. Dobin A, Davis CA, Schlesinger F, Drenkow J, Zaleski C, Jha S, Batut P,  
707 Chaisson M, Gingeras TR. STAR: ultrafast universal RNA-seq aligner.  
708 *Bioinformatics*. 2013;29:15-21.
- 709 32. Schmieder R, Lim YW, Edwards R. Identification and removal of ribosomal  
710 RNA sequences from metatranscriptomes. *Bioinformatics*. 2012;28:433-5.
- 711 33. Altschul SF, Madden TL, Schaffer AA, Zhang J, Zhang Z, Miller W, Lipman  
712 DJ. Gapped BLAST and PSI-BLAST: a new generation of protein database search  
713 programs. *Nucleic Acids Res*. 1997;25:3389-402.
- 714 34. Friedlander MR, Mackowiak SD, Li N, Chen W, Rajewsky N. miRDeep2  
715 accurately identifies known and hundreds of novel microRNA genes in seven animal  
716 clades. *Nucleic Acids Res*. 2012;40:37-52.
- 717 35. Kozomara A, Griffiths-Jones S. miRBase: annotating high confidence  
718 microRNAs using deep sequencing data. *Nucleic Acids Res*. 2014;42:D68-73.
- 719 36. Enright AJ, John B, Gaul U, Tuschl T, Sander C, Marks DS. MicroRNA  
720 targets in *Drosophila*. *Genome Biol*. 2003;5:R1.
- 721 37. Yates A, Akanni W, Amode MR, Barrell D, Billis K, Carvalho-Silva D,  
722 Cummins C, Clapham P, Fitzgerald S, Gil L, Giron CG, Gordon L, Hourlier T, Hunt

723 SE, Janacek SH, Johnson N, Juettemann T, Keenan S, Lavidas I, Martin FJ, Maurel T,  
724 McLaren W, Murphy DN, Nag R, Nuhn M, Parker A, Patricio M, Pignatelli M, Rahtz  
725 M, Riat HS, Sheppard D, Taylor K, Thormann A, Vullo A, Wilder SP, Zadissa A,  
726 Birney E, Harrow J, Muffato M, Perry E, Ruffier M, Spudich G, Trevanion SJ,  
727 Cunningham F, Aken BL, Zerbino DR, Flicek P. Ensembl 2016. *Nucleic Acids Res.*  
728 2016;44:D710-6.

729 38. Mi H, Huang X, Muruganujan A, Tang H, Mills C, Kang D, Thomas PD.  
730 PANTHER version 11: expanded annotation data from Gene Ontology and Reactome  
731 pathways, and data analysis tool enhancements. *Nucleic Acids Res.* 2016.

732 39. Fabregat A, Sidiropoulos K, Garapati P, Gillespie M, Hausmann K, Haw R,  
733 Jassal B, Jupe S, Korninger F, McKay S, Matthews L, May B, Milacic M, Rothfels K,  
734 Shamovsky V, Webber M, Weiser J, Williams M, Wu G, Stein L, Hermjakob H,  
735 D'Eustachio P. The Reactome pathway Knowledgebase. *Nucleic Acids Res.*  
736 2016;44:D481-7.

737 40. Webber J, Clayton A. How pure are your vesicles? *J Extracell Vesicles.*  
738 2013;2.

739 41. WHO. Preventive chemotherapy in human helminthiasis: coordinated use of  
740 anthelmintic drugs in control interventions: a manual for health professionals and  
741 programme managers. Available:  
742 [http://whqlibdoc.who.int/publications/2006/9241547103\\_eng.pdf](http://whqlibdoc.who.int/publications/2006/9241547103_eng.pdf). 2006.

743 42. Stephenson LS, Holland CV, Cooper ES. The public health significance of  
744 *Trichuris trichiura*. *Parasitology.* 2000;121 Suppl:S73-95.

745 43. WHO. Deworming for health and development. Report of the third global  
746 meeting of the partners for parasite control. Geneva: World Health Organization.  
747 2005.

- 748 44. Anonymous. Schistosomiasis and soil-transmitted helminth infections (World  
749 Health Assembly Resolution WHA54.19)  
750 [http://apps.who.int/gb/archive/pdf\\_files/WHA54/ea54r19.pdf](http://apps.who.int/gb/archive/pdf_files/WHA54/ea54r19.pdf). 2001.
- 751 45. Williams SE, Brown TI, Roghanian A, Sallenave JM. SLPI and elafin: one  
752 glove, many fingers. Clin Sci (Lond). 2006;110:21-35.
- 753 46. Scott A, Weldon S, Taggart CC. SLPI and elafin: multifunctional  
754 antiproteases of the WFDC family. Biochem Soc Trans. 2011;39:1437-40.
- 755 47. Wilkinson TS, Roghanian A, Simpson AJ, Sallenave JM. WAP domain  
756 proteins as modulators of mucosal immunity. Biochem Soc Trans. 2011;39:1409-15.
- 757 48. Cantacessi C, Campbell BE, Visser A, Geldhof P, Nolan MJ, Nisbet AJ,  
758 Matthews JB, Loukas A, Hofmann A, Otranto D, Sternberg PW, Gasser RB. A  
759 portrait of the "SCP/TAPS" proteins of eukaryotes-developing a framework for  
760 fundamental research and biotechnological outcomes. Biotechnol Adv. 2009;27:376-  
761 88.
- 762 49. Hansen EP, Kringel H, Williams AR, Nejsum P. Secretion of RNA-  
763 Containing Extracellular Vesicles by the Porcine Whipworm, *Trichuris suis*. J  
764 Parasitol. 2015;101:336-40.
- 765 50. Liegeois S, Benedetto A, Garnier JM, Schwab Y, Labouesse M. The V0-  
766 ATPase mediates apical secretion of exosomes containing Hedgehog-related proteins  
767 in *Caenorhabditis elegans*. J Cell Biol. 2006;173:949-61.
- 768 51. Tritten L, Clarke D, Timmins S, McTier T, Geary TG. *Dirofilaria immitis*  
769 exhibits sex- and stage-specific differences in excretory/secretory miRNA and protein  
770 profiles. Vet Parasitol. 2016;232:1-7.
- 771 52. Zamanian M, Fraser LM, Agbedanu PN, Harischandra H, Moorhead AR, Day  
772 TA, Bartholomay LC, Kimber MJ. Release of small rna-containing exosome-like

773 vesicles from the human filarial parasite *Brugia malayi*. PLoS Negl Trop Dis.  
774 2015;9:e0004069.

775 53. Sato T, Clevers H. Growing self-organizing mini-guts from a single intestinal  
776 stem cell: mechanism and applications. Science. 2013;340:1190-4.

777 54. Frising UC, Stange J, Veldhoen m, Intestinal organoids - a powerful model to  
778 study interactionsof the epithelial barrier with its environment. In: Hampton-Reeves S  
779 editor. 2014; University of Nottingham, UK: Publisher.

780 55. Nozaki K, Mochizuki W, Matsumoto Y, Matsumoto T, Fukuda M, Mizutani  
781 T, Watanabe M, Nakamura T. Co-culture with intestinal epithelial organoids allows  
782 efficient expansion and motility analysis of intraepithelial lymphocytes. J  
783 Gastroenterol. 2016;51:206-13.

784 56. Andreu Z, Yanez-Mo M. Tetraspanins in extracellular vesicle formation and  
785 function. Front Immunol. 2014;5:442.

786 57. Cwiklinski K, de la Torre-Escudero E, Trelis M, Bernal D, Dufresne PJ,  
787 Brennan GP, O'Neill S, Tort J, Paterson S, Marcilla A, Dalton JP, Robinson MW. The  
788 Extracellular Vesicles of the helminth pathogen, *Fasciola hepatica*: biogenesis  
789 pathways and cargo molecules involved in parasite pathogenesis. Mol Cell  
790 Proteomics. 2015;14:3258-73.

791 58. Tzelos T, Matthews JB, Buck AH, Simbari F, Frew D, Inglis NF, McLean K,  
792 Nisbet AJ, Whitelaw CB, Knox DP, McNeilly TN. A preliminary proteomic  
793 characterisation of extracellular vesicles released by the ovine parasitic nematode,  
794 *Teladorsagia circumcincta*. Vet Parasitol. 2016;221:84-92.

795 59. de la Torre-Escudero E, Bennett AP, Clarke A, Brennan GP, Robinson MW.  
796 Extracellular vesicle biogenesis in helminths: more than one route to the surface?  
797 Trends Parasitol. 2016;32:921-9.



- 798 60. Nishikado H, Fujimura T, Taka H, Mineki R, Ogawa H, Okumura K, Takai T.  
799 Cysteine protease antigens cleave CD123, the alpha subunit of murine IL-3 receptor,  
800 on basophils and suppress IL-3-mediated basophil expansion. *Biochem Biophys Res*  
801 *Commun.* 2015;460:261-6.
- 802 61. Drake LJ, Bianco AE, Bundy DA, Ashall F. Characterization of peptidases of  
803 adult *Trichuris muris*. *Parasitology.* 1994;109 ( Pt 5):623-30.
- 804 62. Cantacessi C, Gasser RB. SCP/TAPS proteins in helminths-where to from  
805 now? *Mol Cell Probes.* 2012;26:54-9.
- 806 63. Wu XJ, Sabat G, Brown JF, Zhang M, Taft A, Peterson N, Harms A, Yoshino  
807 TP. Proteomic analysis of *Schistosoma mansoni* proteins released during in vitro  
808 miracidium-to-sporocyst transformation. *Mol Biochem Parasitol.* 2009;164:32-44.
- 809 64. Chen J, Hu X, He S, Wang L, Hu D, Wang X, Zheng M, Yang Y, Liang C, Xu  
810 J, Yu X. Expression and immune response analysis of *Schistosoma japonicum* VAL-  
811 1, a homologue of vespid venom allergens. *Parasitol Res.* 2010;106:1413-8.
- 812 65. Tribolet L, Cantacessi C, Pickering DA, Navarro S, Doolan DL, Trieu A, Fei  
813 H, Chao Y, Hofmann A, Gasser RB, Giacomini PR, Loukas A. Probing of a human  
814 proteome microarray with a recombinant pathogen protein reveals a novel mechanism  
815 by which hookworms suppress B-cell receptor signaling. *J Infect Dis.* 2015;211:416-  
816 25.
- 817 66. Moser JM, Freitas T, Arasu P, Gibson G. Gene expression profiles associated  
818 with the transition to parasitism in *Ancylostoma caninum* larvae. *Mol Biochem*  
819 *Parasitol.* 2005;143:39-48.
- 820 67. Loukas A, Bethony J, Brooker S, Hotez P. Hookworm vaccines: past, present,  
821 and future. *Lancet Infect Dis.* 2006;6:733-41.

- 822 68. Caradec J, Kharmate G, Hosseini-Beheshti E, Adomat H, Gleave M, Guns E.  
823 Reproducibility and efficiency of serum-derived exosome extraction methods. Clin  
824 Biochem. 2014;47:1286-92.
- 825 69. Kesimer M, Scull M, Brighton B, DeMaria G, Burns K, O'Neal W, Pickles RJ,  
826 Sheehan JK. Characterization of exosome-like vesicles released from human  
827 tracheobronchial ciliated epithelium: a possible role in innate defense. FASEB J.  
828 2009;23:1858-68.
- 829 70. Valadi H, Ekstrom K, Bossios A, Sjostrand M, Lee JJ, Lotvall JO. Exosome-  
830 mediated transfer of mRNAs and microRNAs is a novel mechanism of genetic  
831 exchange between cells. Nat Cell Biol. 2007;9:654-9.
- 832 71. Nguyen DG, Booth A, Gould SJ, Hildreth JE. Evidence that HIV budding in  
833 primary macrophages occurs through the exosome release pathway. J Biol Chem.  
834 2003;278:52347-54. Epub 2003/10/17.
- 835 72. Fang Y, Wu N, Gan X, Yan W, Morrell JC, Gould SJ. Higher-order  
836 oligomerization targets plasma membrane proteins and HIV gag to exosomes. PLoS  
837 Biol. 2007;5:e158.
- 838 73. Krishnamoorthy L, Bess JW, Jr., Preston AB, Nagashima K, Mahal LK. HIV-  
839 1 and microvesicles from T cells share a common glycome, arguing for a common  
840 origin. Nat Chem Biol. 2009;5:244-50.
- 841 74. Shen B, Wu N, Yang JM, Gould SJ. Protein targeting to  
842 exosomes/microvesicles by plasma membrane anchors. J Biol Chem.  
843 2011;286:14383-95.
- 844 75. Cai J, Han Y, Ren H, Chen C, He D, Zhou L, Eisner GM, Asico LD, Jose PA,  
845 Zeng C. Extracellular vesicle-mediated transfer of donor genomic DNA to recipient

846 cells is a novel mechanism for genetic influence between cells. J Mol Cell Biol.  
847 2013;5:227-38.

848 76. Daugaard I, Hansen TB. Biogenesis and Function of Ago-Associated RNAs.  
849 Trends Genet. 2017.

850 77. McSorley HJ, Loukas A. The immunology of human hookworm infections.  
851 Parasite Immunol. 2010;32:549-59.

852

### 853 **Figure legends**

#### 854 **Figure 1. Bioinformatic analyses of the proteins secreted by *Trichuris muris*.** (A)

855 Bar graph showing the most abundant protein families after a Pfam analysis on the  
856 excretory/secretory proteins derived from *T. muris*. (B) Bar graph showing the most  
857 abundantly represented gene ontology molecular function terms in excretory/secretory  
858 proteins derived from *T. muris*.

859

#### 860 **Figure 2. Tunable resistive pulse sensing analysis of the extracellular vesicles**

861 **(EVs) secreted by *Trichuris muris*.** (A) The size and number of the EVs secreted by  
862 *T. muris* after purification using an Optiprep® gradient was analysed using a qNano  
863 system (iZon). (B) Logarithmic plot highlighting the smaller numbers of vesicles in  
864 fractions 7-10. Only fractions 4-10 contained enough vesicles for the analyses.

865

#### 866 **Figure 3. *Trichuris muris* extracellular vesicles (EVs) are internalized by murine**

867 **colonic organoids.** (A) Representative fluorescence images of PKH-26-labelled EVs  
868 (red) internalized by organoids after 3 hours at 37°C and 4°C (metabolically inactive  
869 cells). Hoechst dye (blue) was used to label cell nuclei. † indicates the lumen of the  
870 organoids, which corresponds to the murine gut lumen, separated by the dotted line

871 from the epithelial cell layer. White bar corresponds to 20  $\mu$ m. (B) Magnification of  
872 the framed area in A. White bar corresponds to 10  $\mu$ m. (C) Percentage of the corrected  
873 total fluorescence (CTF) adjusted by background fluorescence and the surveyed area  
874 of PKH26-stained EVs in total epithelial cells (donut-shaped selection) or in the  
875 lumen incubated under different conditions in 10 different organoids from 2 technical  
876 replicates (5 each). \*\*\* indicates highly significant results ( $p < 0.001$ ). Error bars  
877 indicate 95% confidence intervals.

878

879 **Figure 4. Gene ontology analysis of proteins from the extracellular vesicles (EVs)**  
880 **secreted by *Trichuris muris*.** (A) Bar graph showing the most abundantly represented  
881 gene ontology biological process terms in proteins present in the EVs secreted by *T.*  
882 *muris*. (B) Bar graph showing the most abundantly represented gene ontology  
883 molecular function terms in proteins present in the EVs secreted by *T. muris*.

884

885 **Figure 5. Analysis of the 475 full-length mRNAs detected in *Trichuris muris***  
886 **extracellular vesicles.** (A) Bar graph showing the most represented protein families  
887 (Pfam) from the translated mRNAs. (B) Molecular functions and (C) biological  
888 functions of proteins encoded by each of the 475 transcripts assigned to gene ontology  
889 functional annotation.

890

891 **Figure 6. Prediction of *T. muris* extracellular vesicle (EV) miRNA target**  
892 **interactions to murine host genes.** Functional map of *T. muris* EV miRNAs and  
893 their target murine host genes. (A) Individual targeted host genes are categorized by  
894 PantherDB signaling pathway analysis (heat map corresponds to individual targeted  
895 genes in the murine host). Bottom axis shows the 56 identified miRNAs in *T. muris*

896 EVs and their abundances (average mean read counts from two biological replicates),  
 897 termed according to their closest homologues (*de novo* transcripts were designated as  
 898 tmu.miR.ev#). Total number of targeted genes identified by PantherDB categories  
 899 classified as (B) ‘immune system related’, (C) ‘receptor regulation’, and (D)  
 900 ‘transcription regulation’.

901

902 **Supplementary Figure 1. Prediction of *T. muris* extracellular vesicle (EV)**  
 903 **miRNA target interactions to murine host genes.** Functional map of *T. muris* EV  
 904 miRNAs and their target murine host genes categorized by PantherDB signalling,  
 905 metabolic, disease, and other pathways. Heat map corresponds to individual targeted  
 906 genes in the murine host.

907

908 **Supplementary Table 1. Detailed analysis of the proteins secreted by *Trichuris***  
 909 ***muris*.** Proteins were annotated using Blast2GO [26], and the description blast e-  
 910 values, gene ontology (GO) terms and enzyme codes are shown. Information about  
 911 the number of unique peptides, peptide-spectrum matches (PSM), spectrum counting  
 912 and coverage is also provided for each protein and batch analysed.

913

914 **Supplementary Table 2. Signal peptide analysis of the proteins secreted by**  
 915 ***Trichuris muris*.** An analysis to check for the presence of a signal peptide in each of  
 916 the proteins secreted by *T. muris* was performed using SignalP [29].

917

918 **Supplementary Table 3. Proteomic analysis of extracellular vesicles (EVs)**  
 919 **secreted by *Trichuris muris*.** Details of the identification of the proteins present in  
 920 the EVs secreted by *T. muris* using X!Tandem, Tide, MS-GF + and OMSSA. All

921 proteins are shown, including contaminants, and independently of the number of  
922 unique peptides identified.

923

924 **Supplementary Table 4. Curated proteomic analysis of extracellular vesicles**  
925 **(EVs) secreted by *Trichuris muris*.** Proteins are sorted by theoretical abundance  
926 (spectrum counting). Only proteins from *T. muris* or *Mus musculus* are shown.

927

928 **Supplementary Table 5. Data on 475 detected mRNA transcripts from *T. muris***  
929 **extracellular vesicles.** RNA-seq data was aligned to the *T. muris* reference genome  
930 models [30] and the E-value of the alignment, the fragments per kilobase of exon  
931 model per million mapped reads (FPKM) normalized by the length of the gene and  
932 the relative coverage of the alignment are provided.

933

934 **Supplementary Table 6. Data description on predicted *T. muris* miRNA-host**  
935 **target interactions.** Table showing the 56 miRNAs identified in the *T. muris*  
936 extracellular vesicles and their 2,043 3'UTR predicted binding sites in the mouse  
937 genome.

938 **Table 1. Features of the different fractions isolated after Optiprep fractionation**  
 939 **of extracellular vesicles from *Trichuris muris*.** Despite protein being detected in all  
 940 fractions, only vesicles from fractions 4-10 could be quantified. The purity of the  
 941 different fractions was calculated according to [40].  
 942

| <b>Optiprep fraction</b> | <b>Density (g/mL)</b> | <b>Protein quantification (µg/ml)</b> | <b>Particle concentration (particles/mL)</b> | <b>Purity of vesicles particles/µg</b> | <b>Particle size nm</b> |
|--------------------------|-----------------------|---------------------------------------|----------------------------------------------|----------------------------------------|-------------------------|
| <b>S1</b>                | 1.04                  | 104.69                                | -                                            | -                                      | -                       |
| <b>S2</b>                | 1.05                  | 290.10                                | -                                            | -                                      | -                       |
| <b>S3</b>                | 1.05                  | 435.58                                | -                                            | -                                      | -                       |
| <b>S4</b>                | 1.06                  | 477.86                                | 2.96E+08                                     | 6.19E+05                               | 93±41.5                 |
| <b>S5</b>                | 1.07                  | 474.19                                | 7.47E+10                                     | 1.58E+08                               | 72±11.7                 |
| <b>S6</b>                | 1.07                  | 310.61                                | 1.34E+12                                     | 4.31E+09                               | 72±23.8                 |
| <b>S7</b>                | 1.08                  | 202.99                                | 8.21E+10                                     | 4.04E+08                               | 90±25.5                 |
| <b>S8</b>                | 1.10                  | 160.76                                | 1.31E+10                                     | 8.15E+07                               | 152±75.3                |
| <b>S9</b>                | 1.12                  | 190.46                                | 1.31E+10                                     | 6.88E+07                               | 183±68.2                |
| <b>S10</b>               | 1.15                  | 436.86                                | 1.71E+09                                     | 3.91E+06                               | 165±54.9                |
| <b>S11</b>               | 1.21                  | 232.77                                | -                                            | -                                      | -                       |
| <b>S12</b>               | 1.27                  | 83.35                                 | -                                            | -                                      | -                       |

943

A

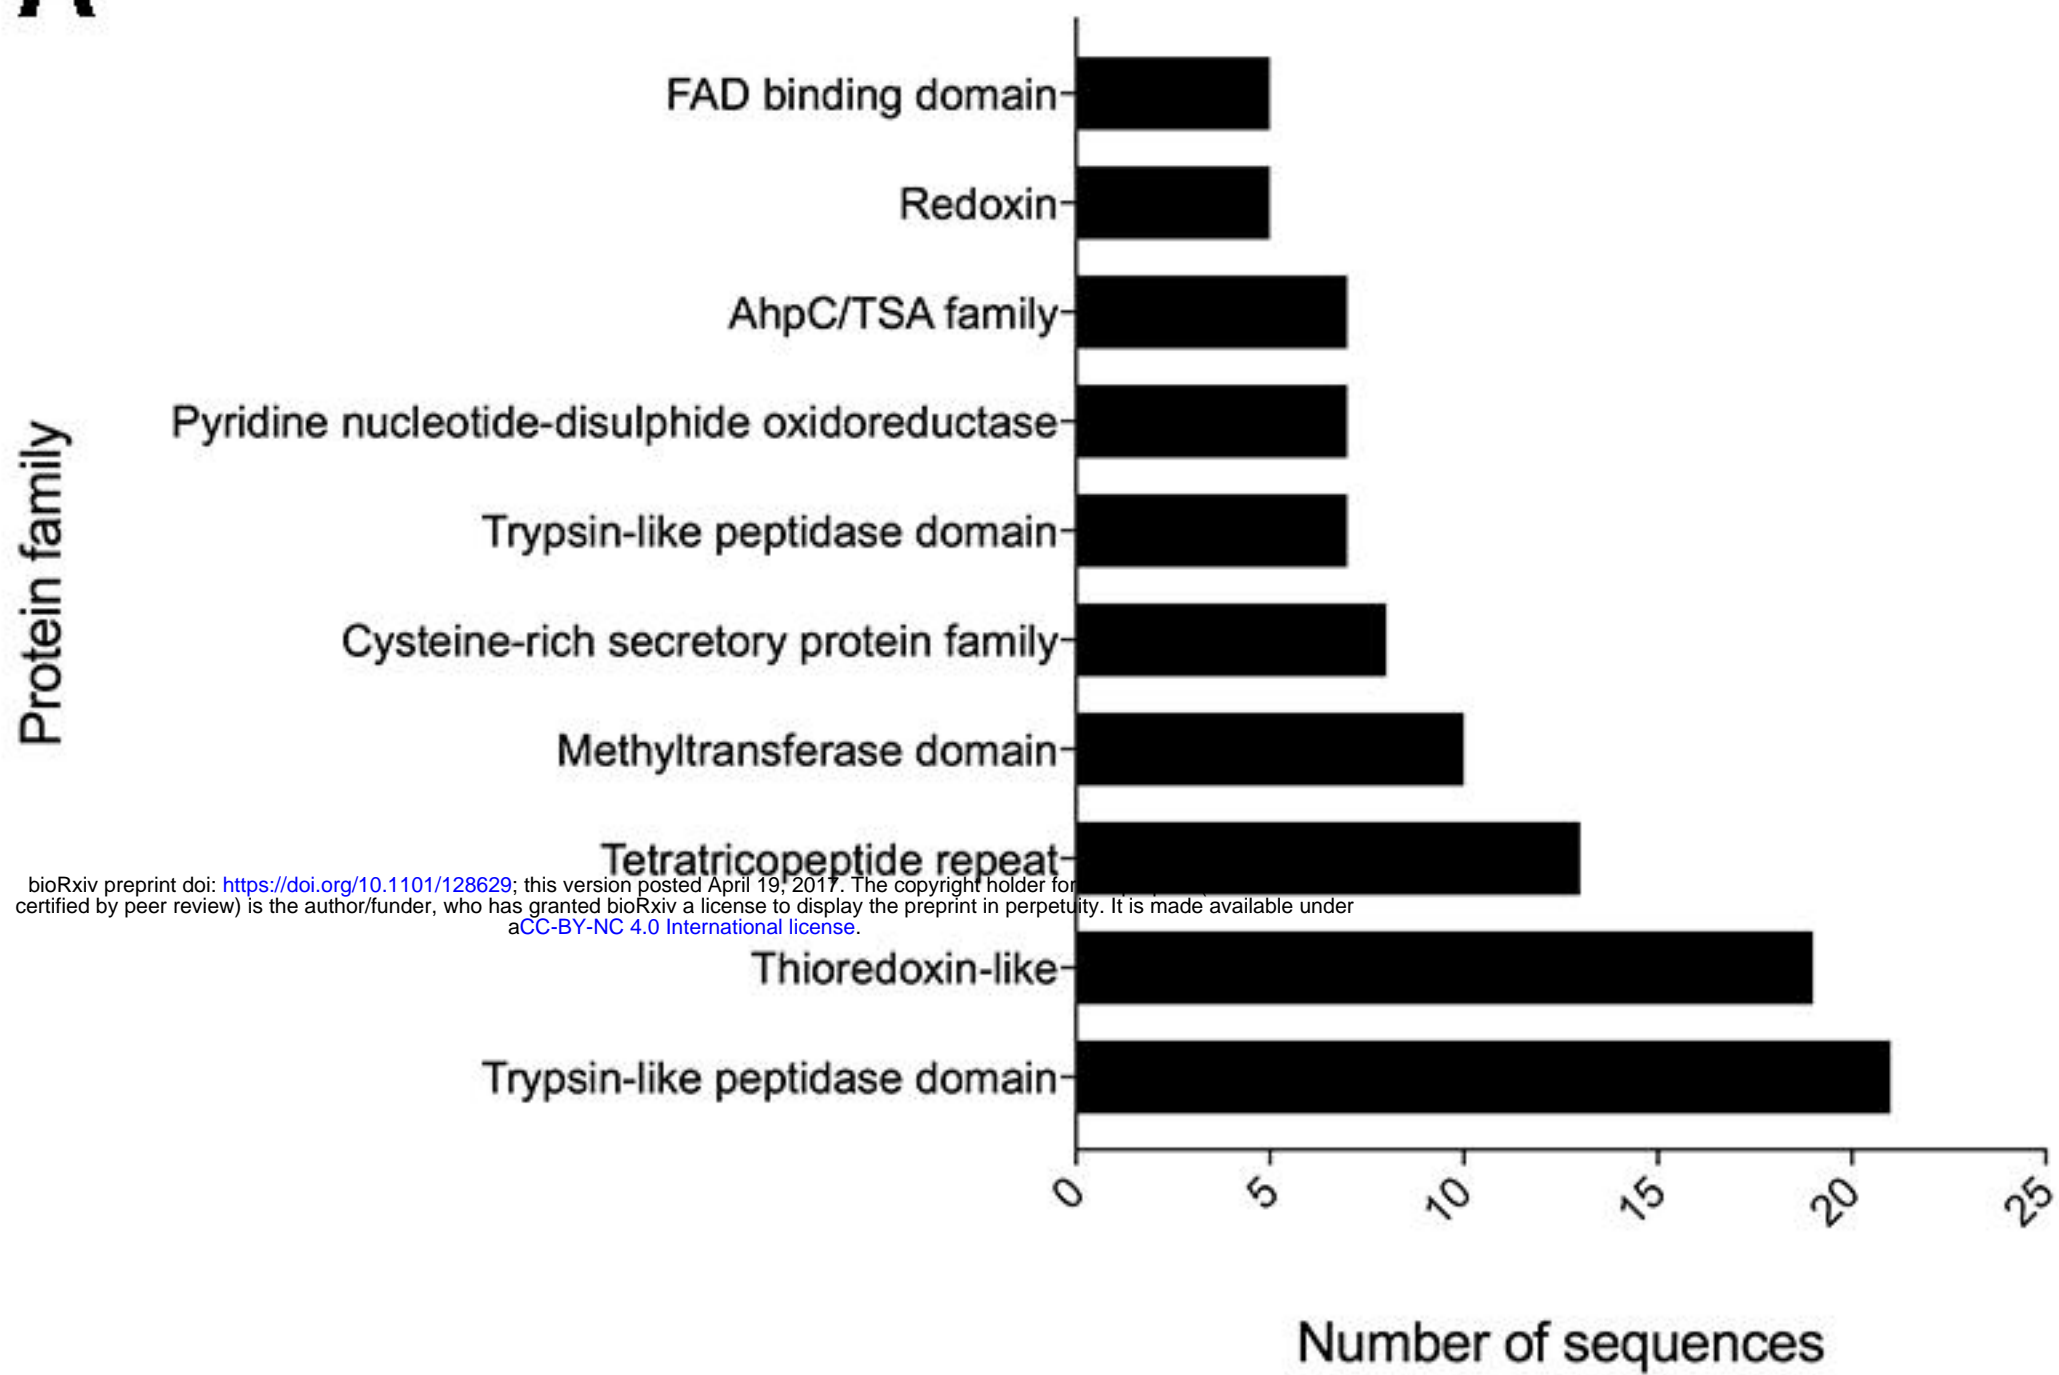

B

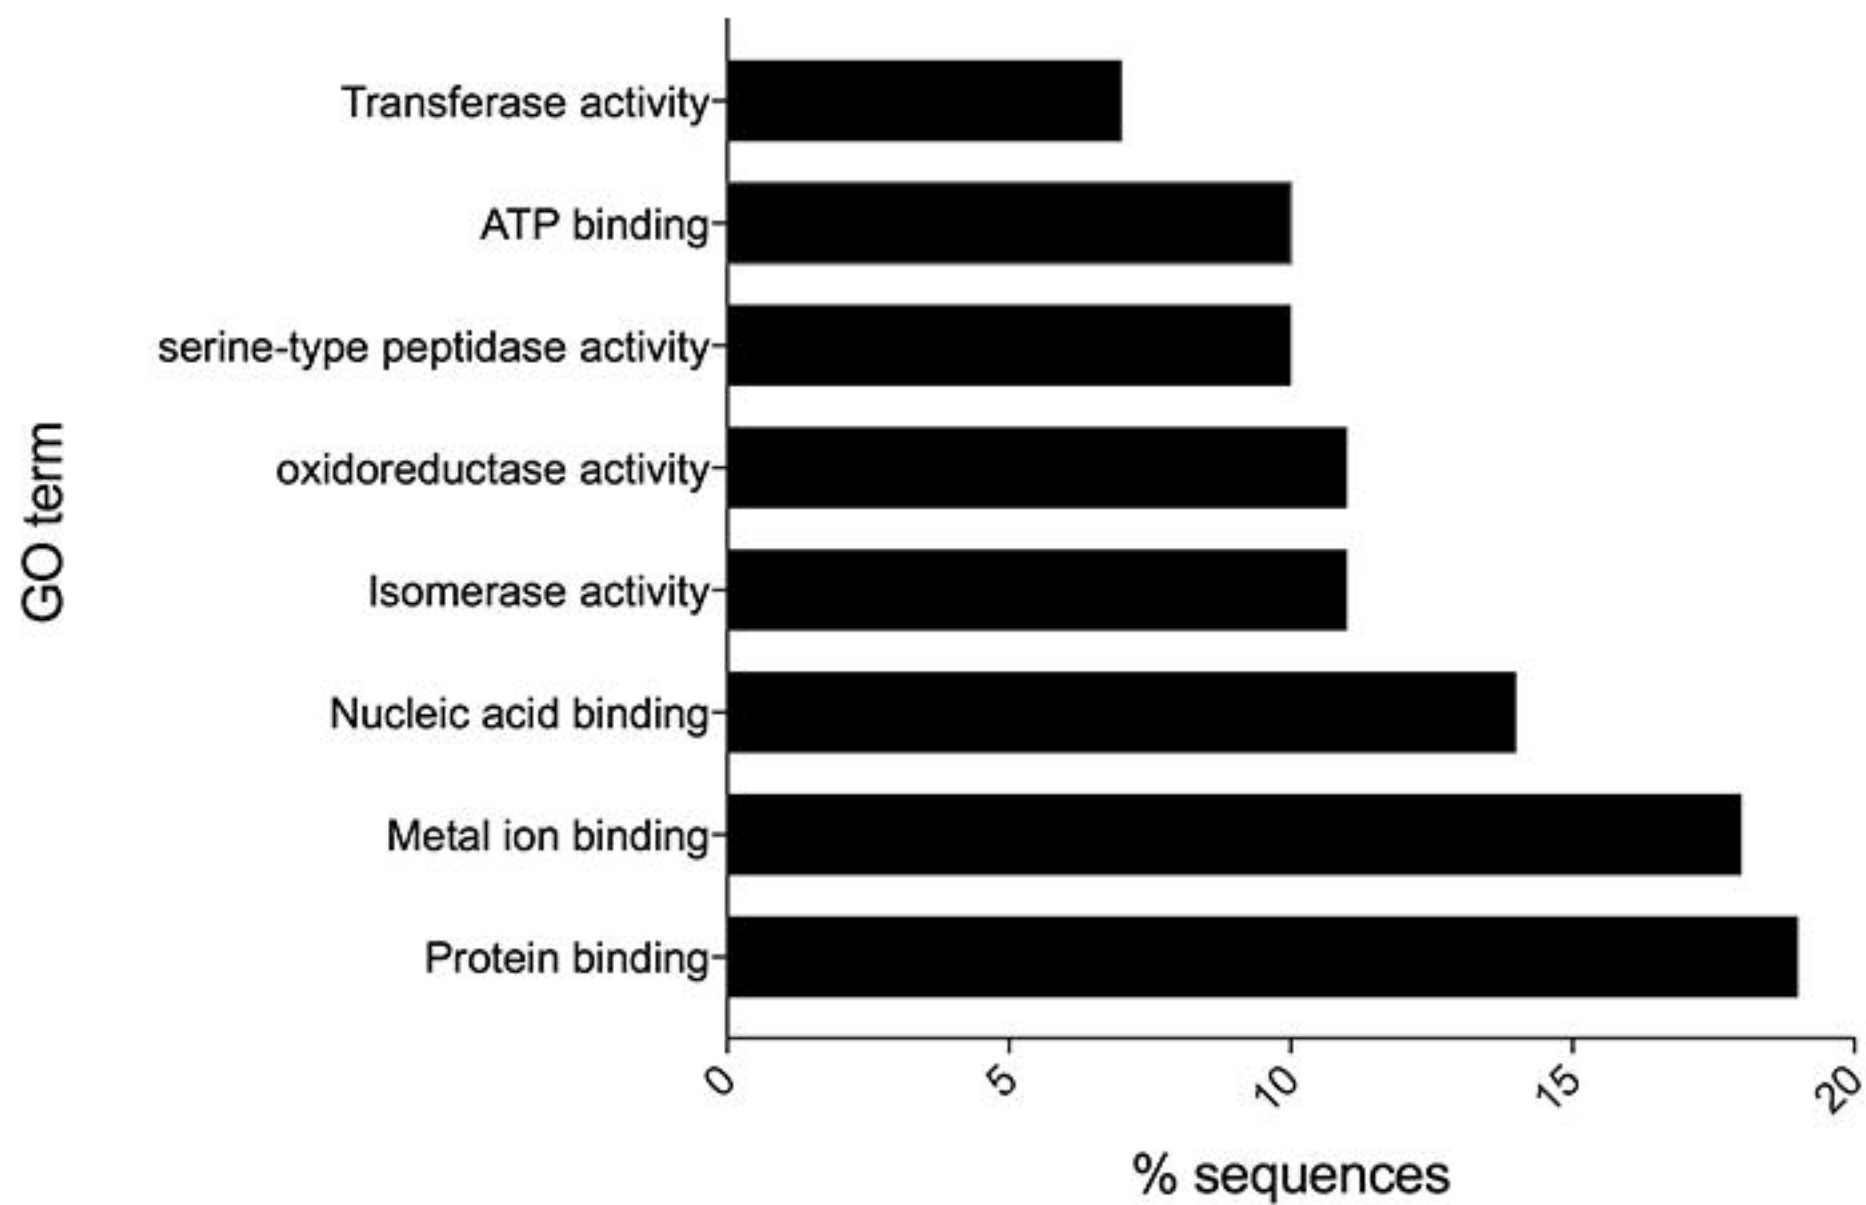



**A**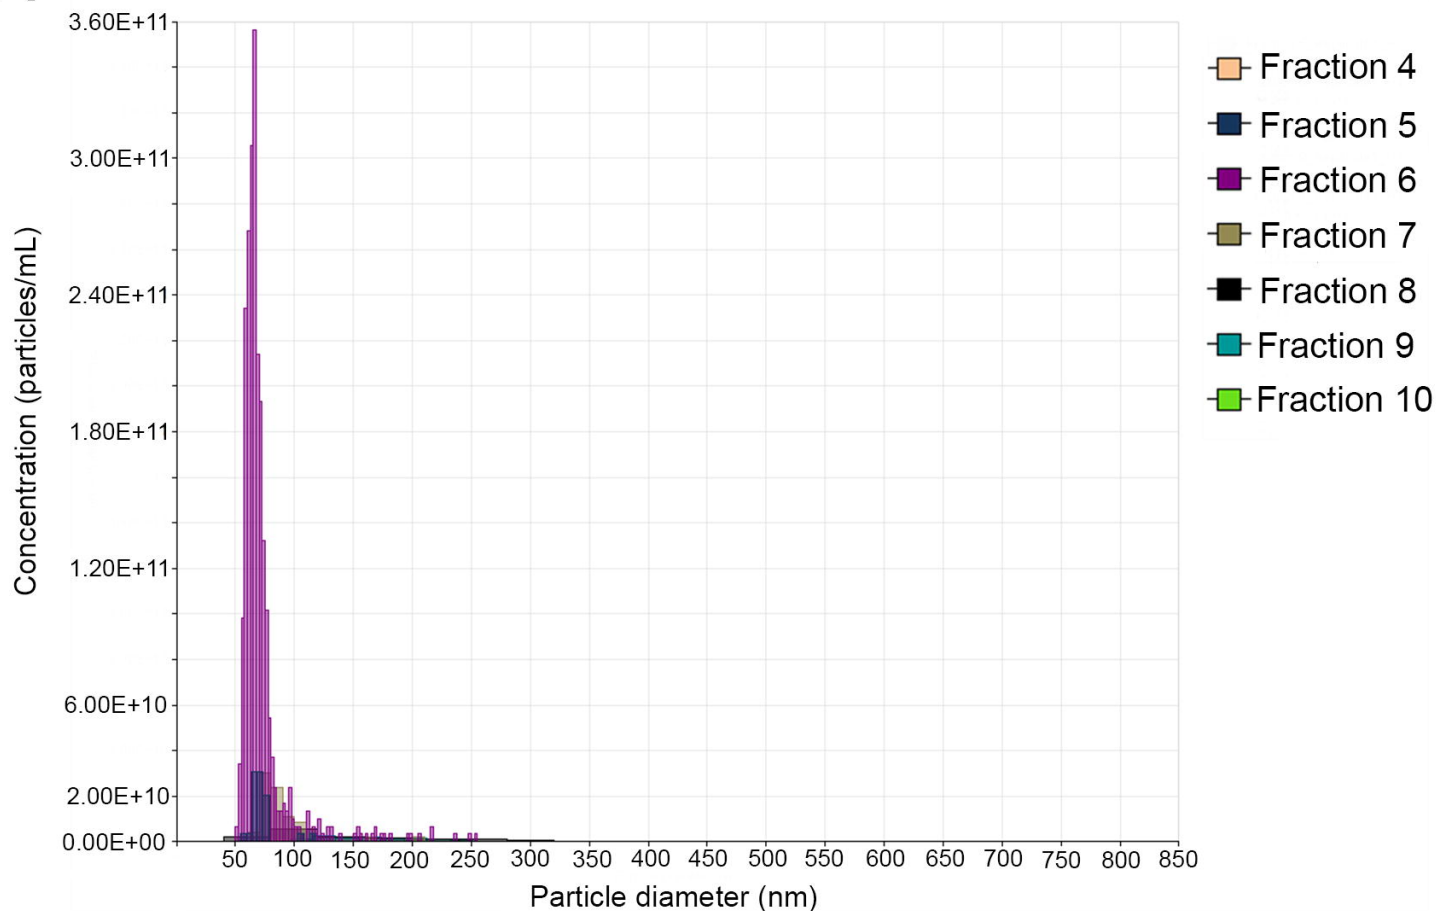**B**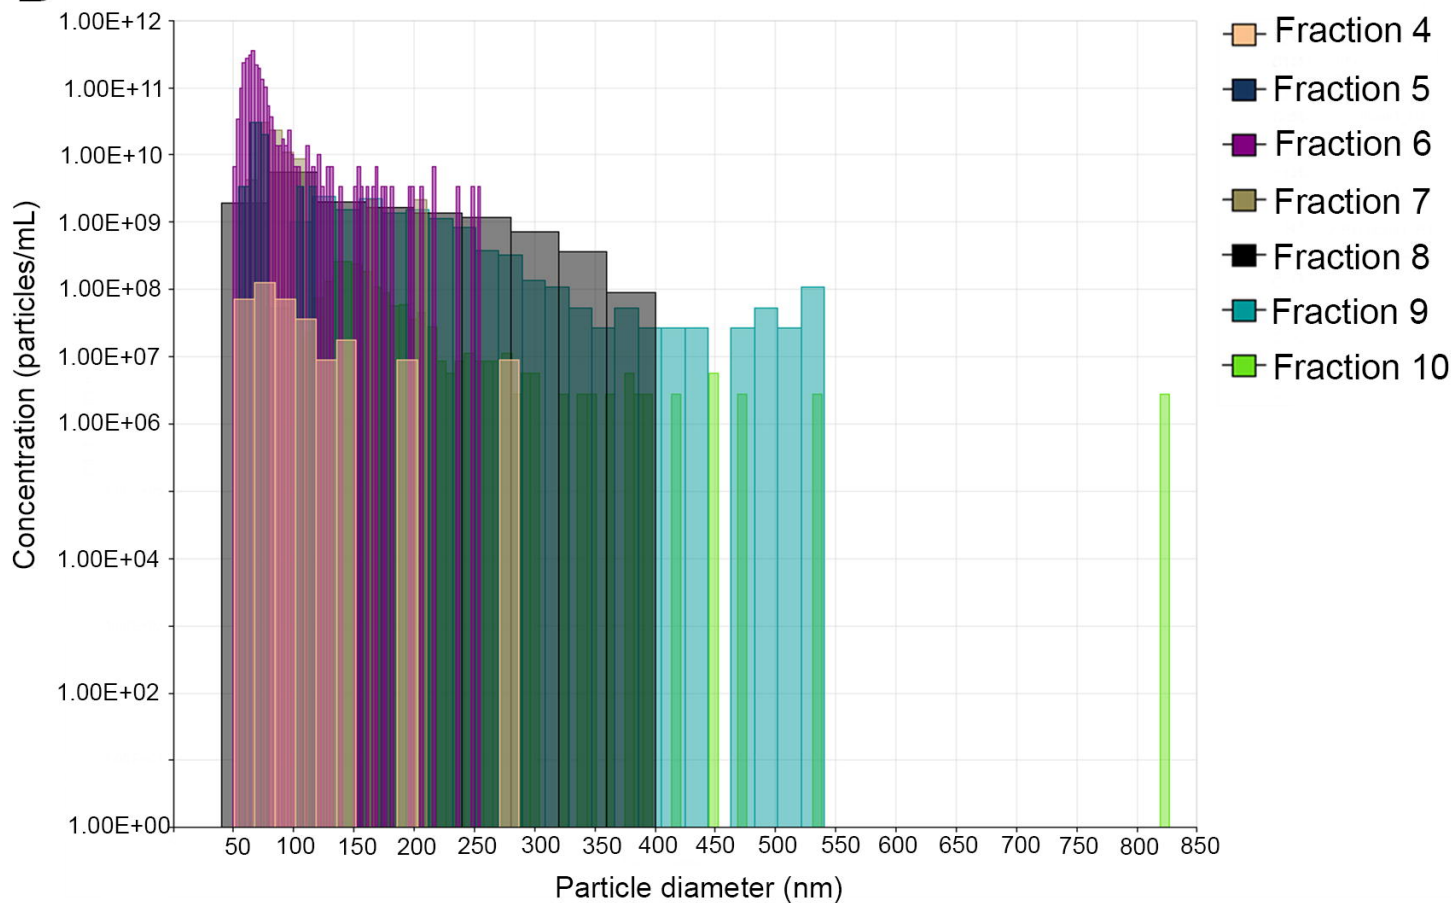

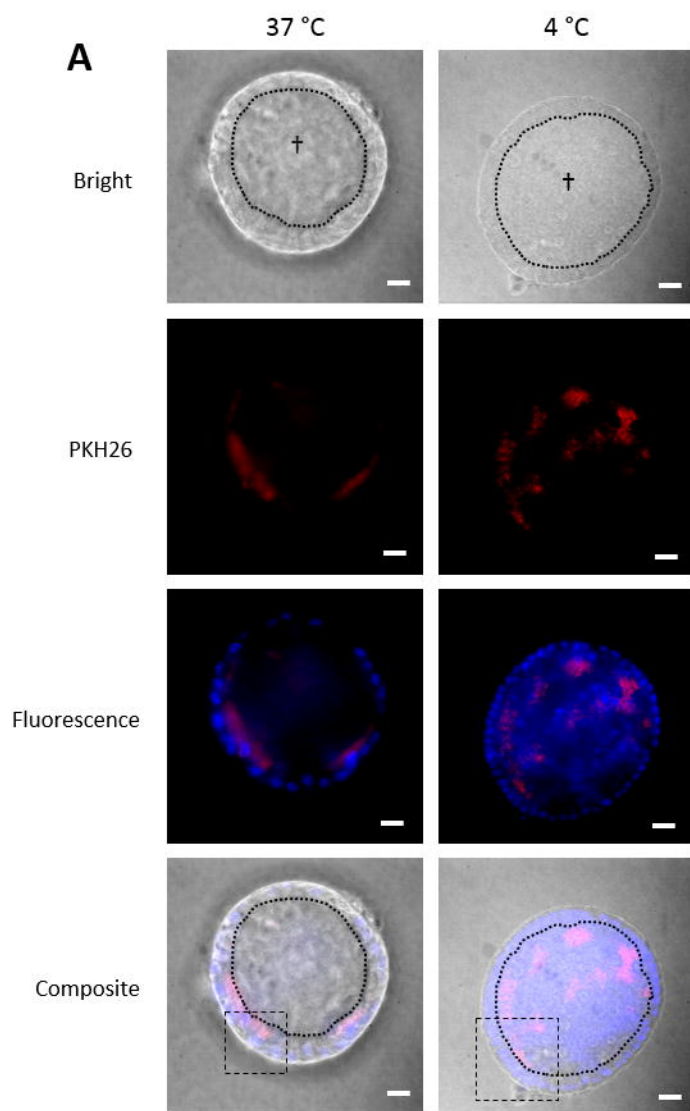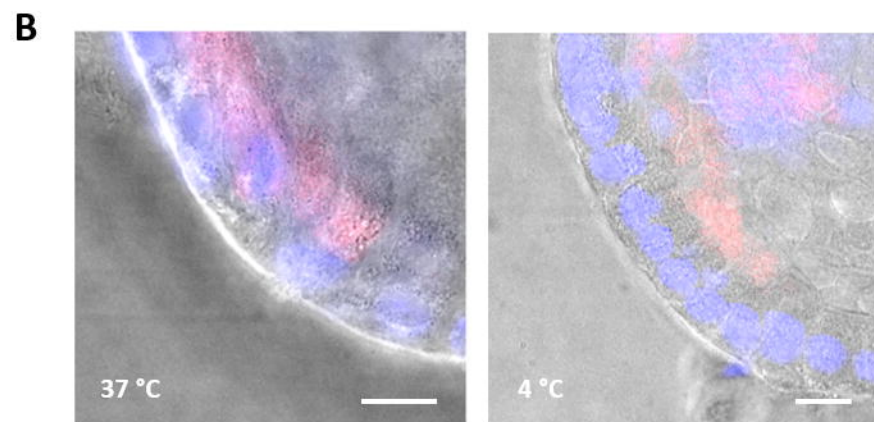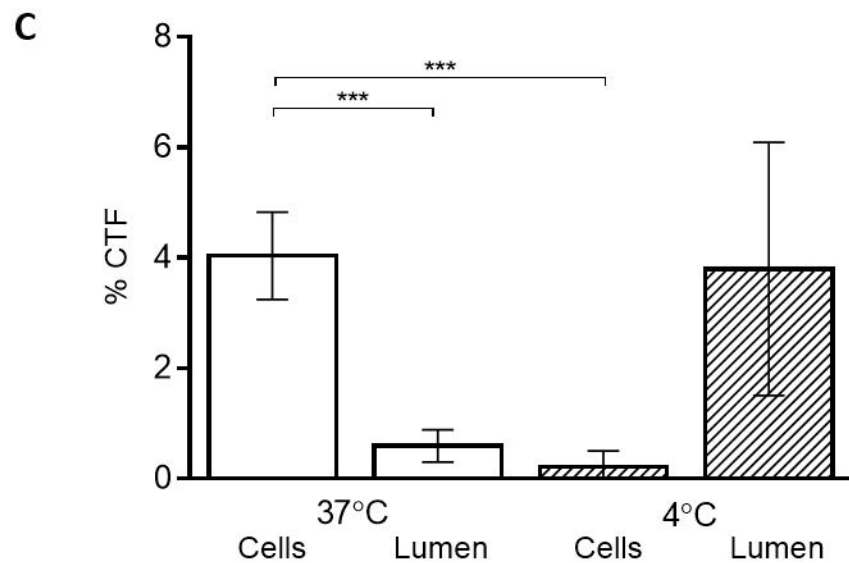

**A**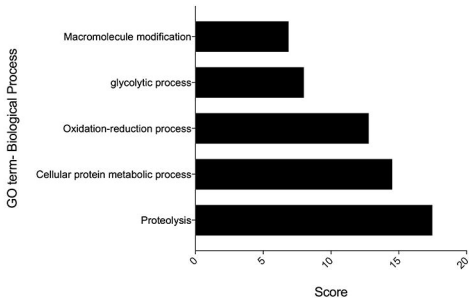**B**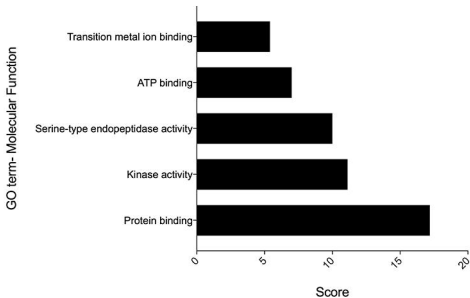

**A**

Protein family

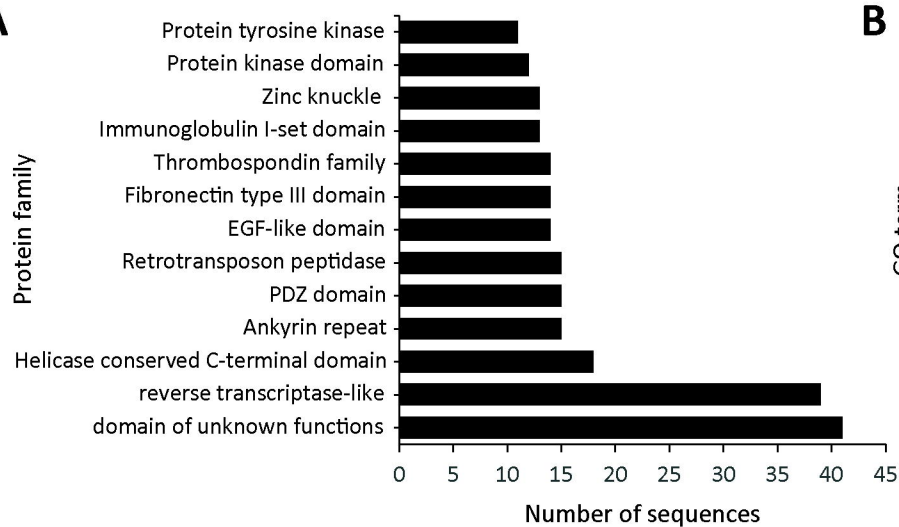**B**

GO term

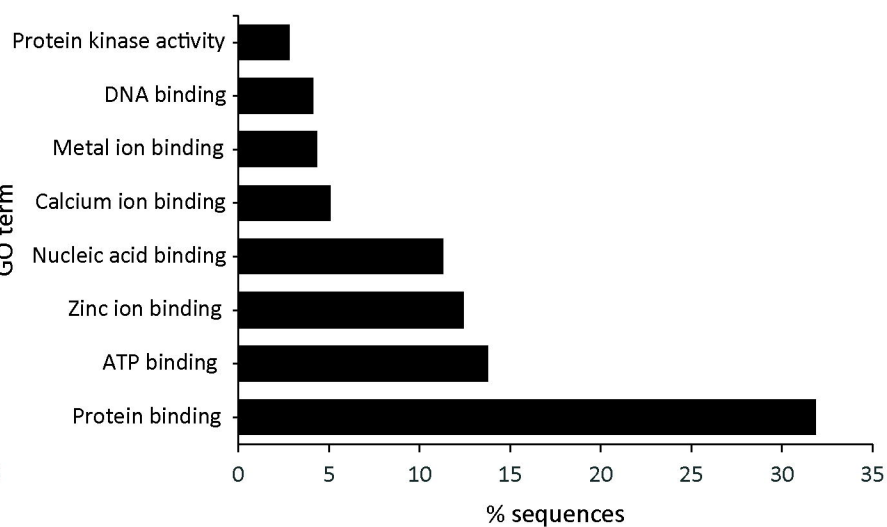**C**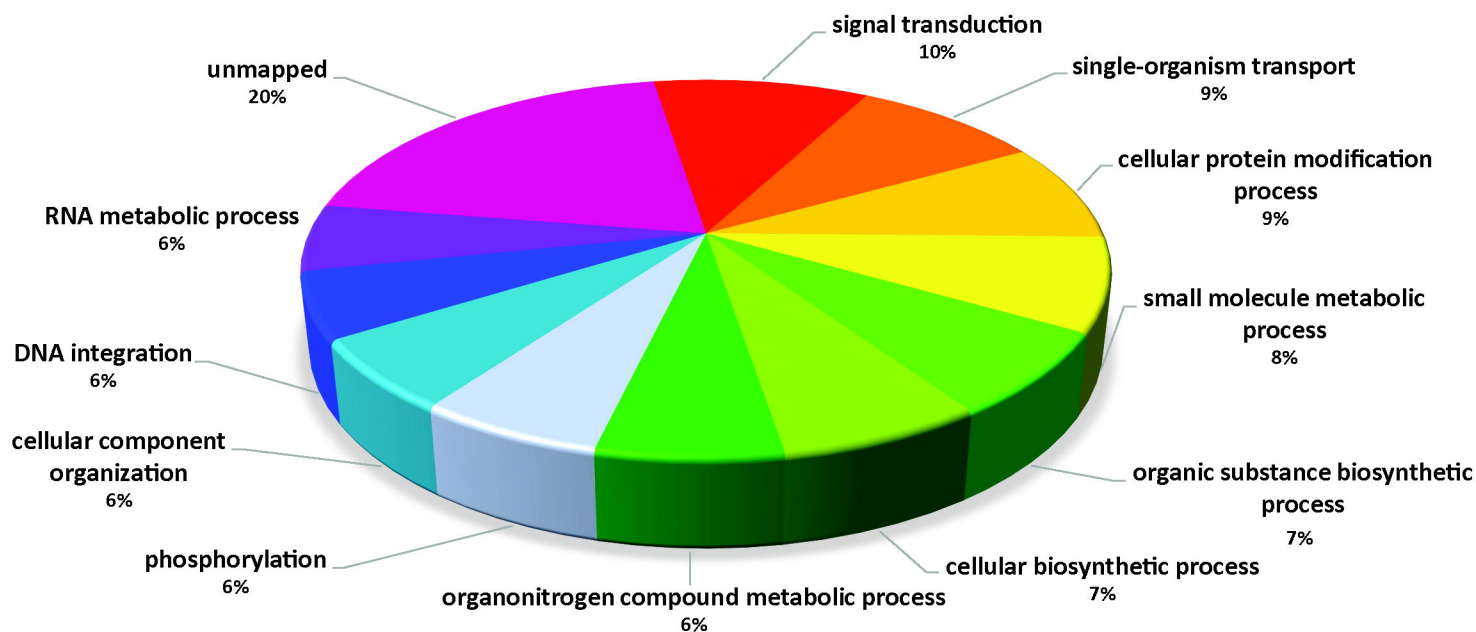

A

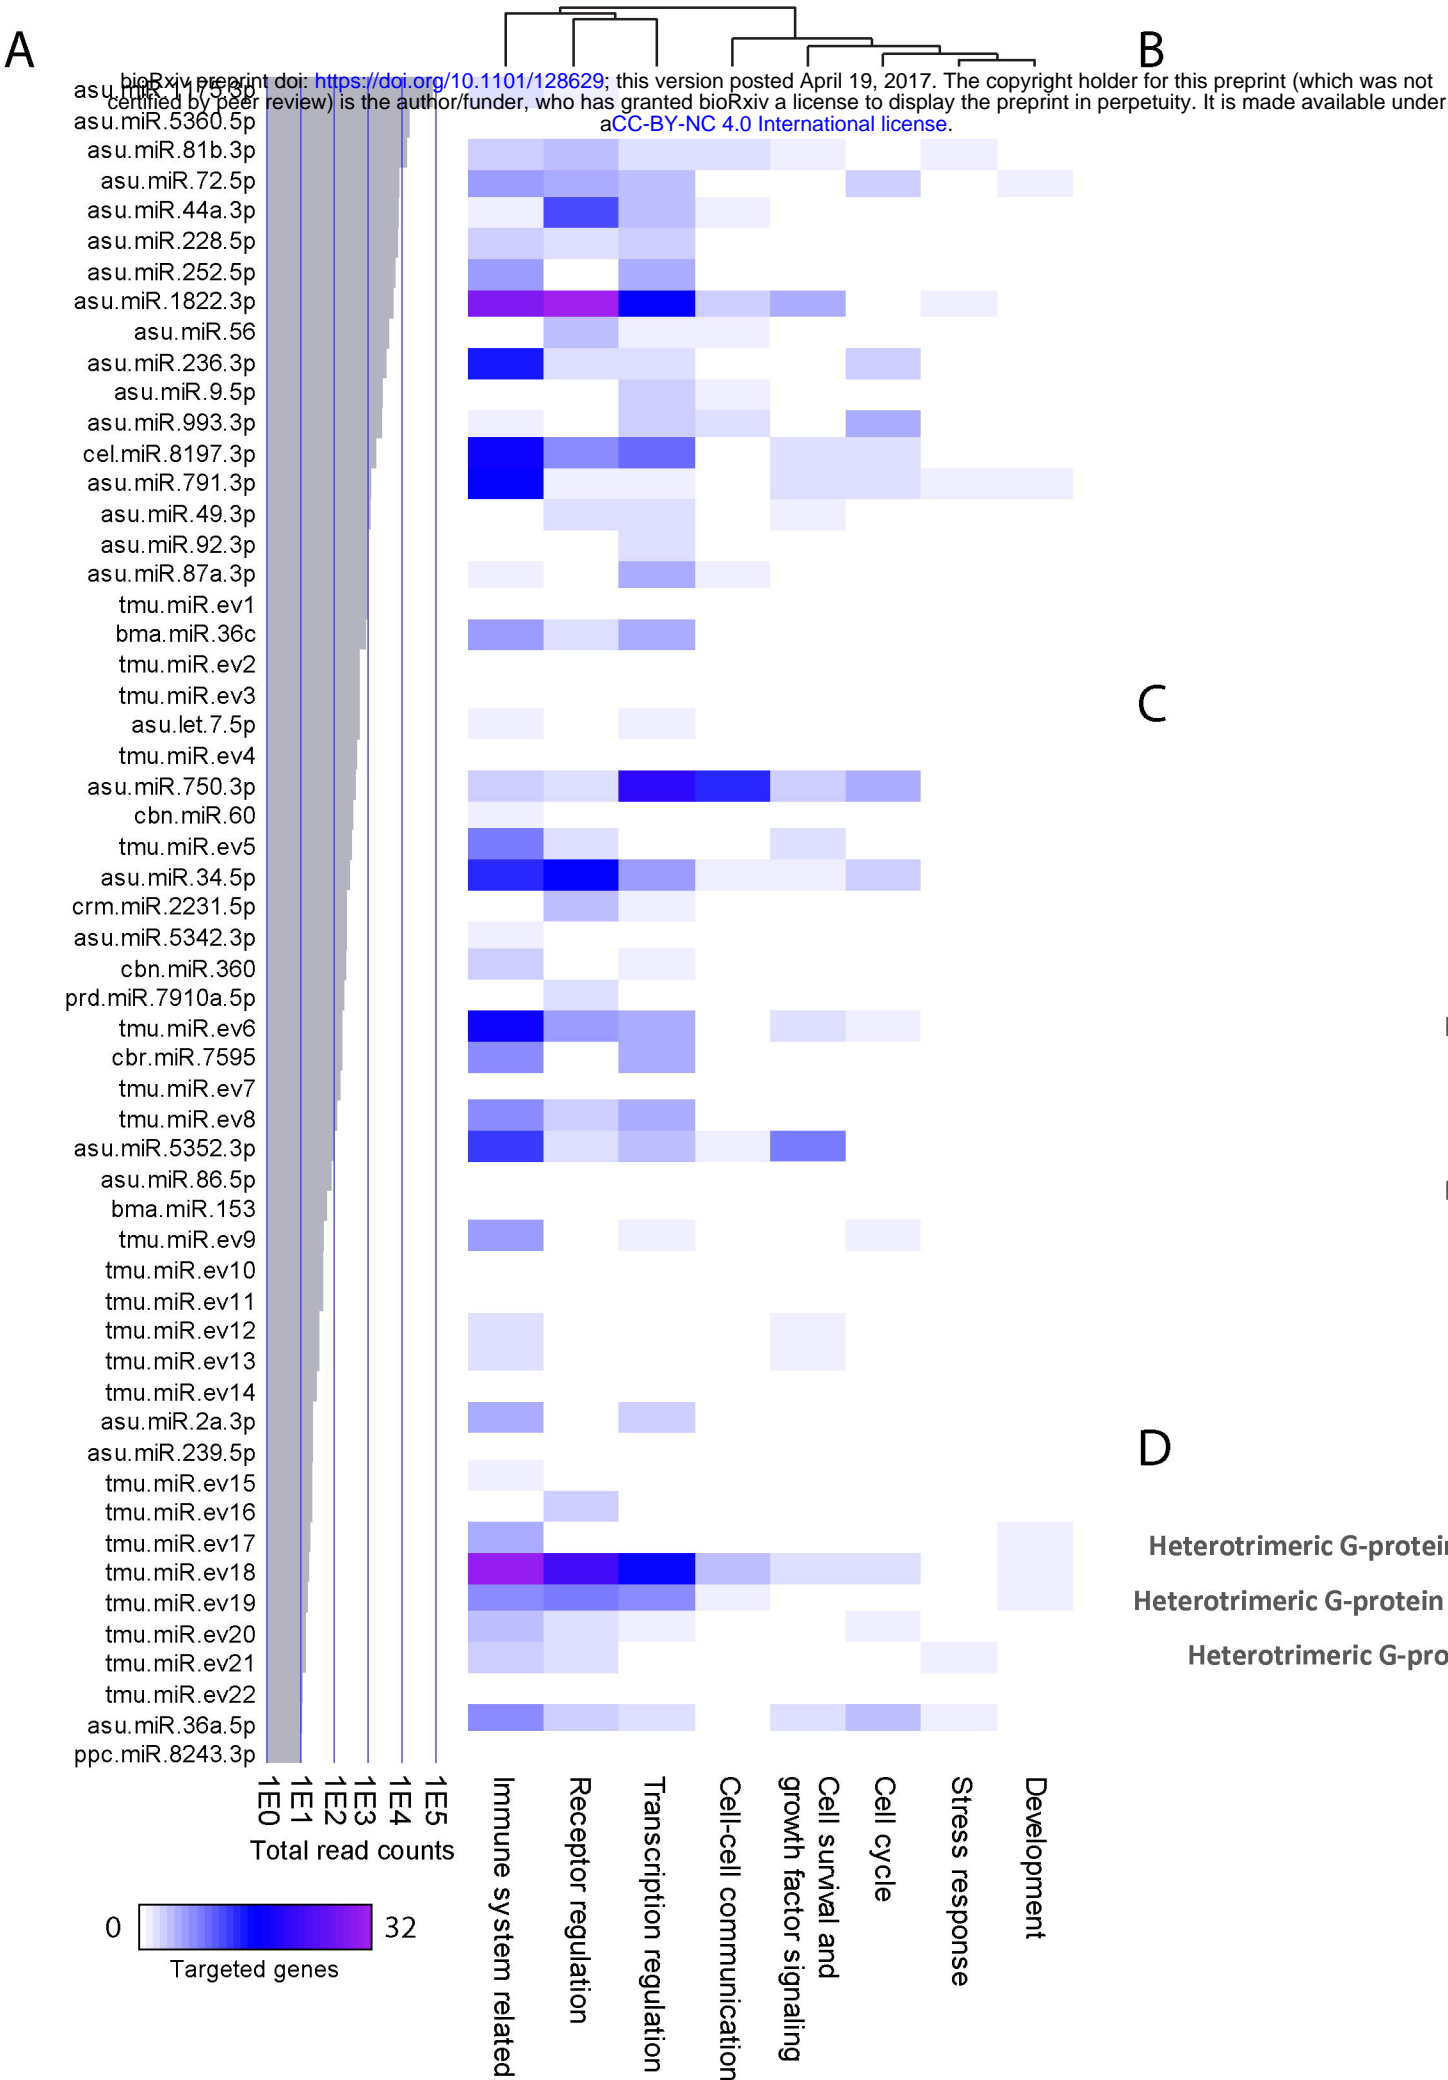

B

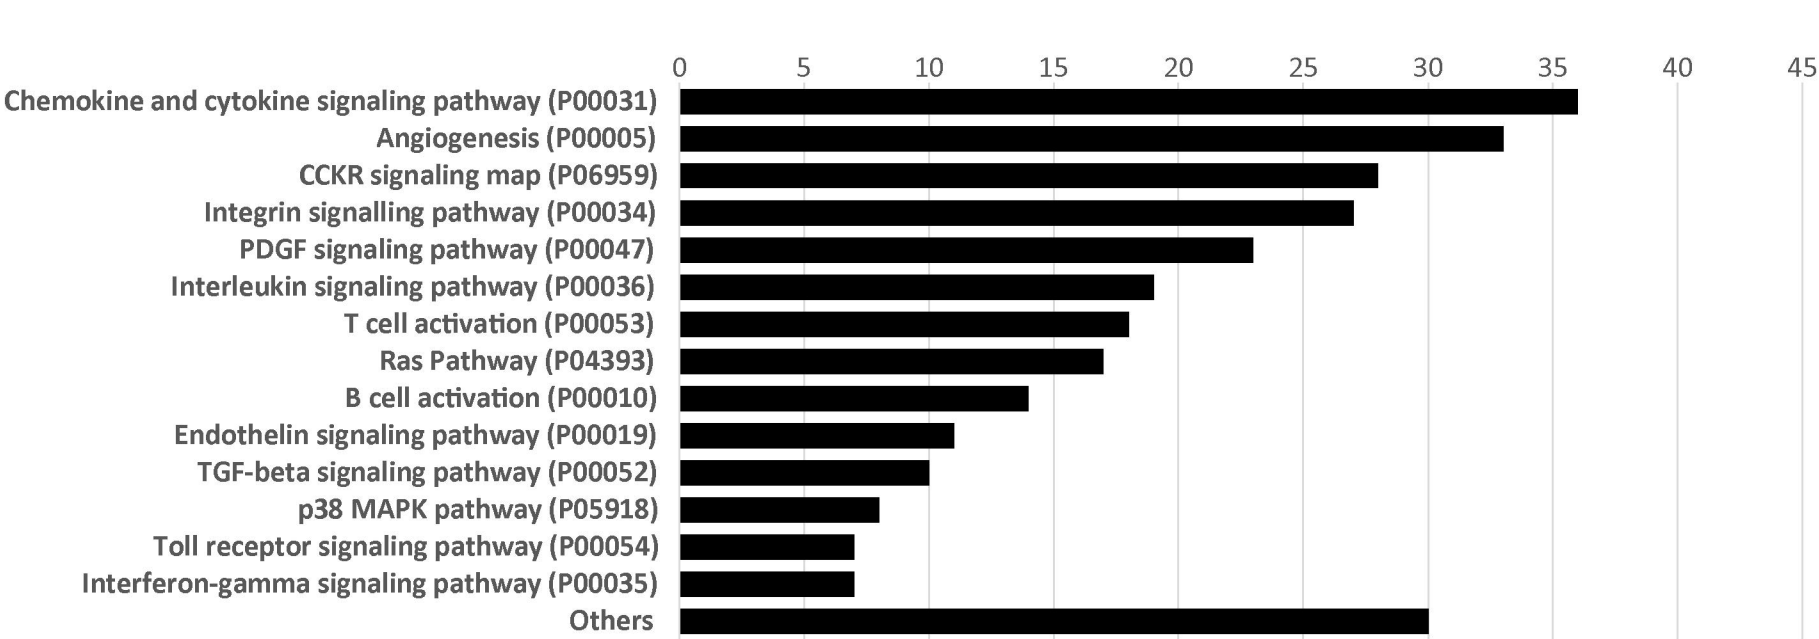

C

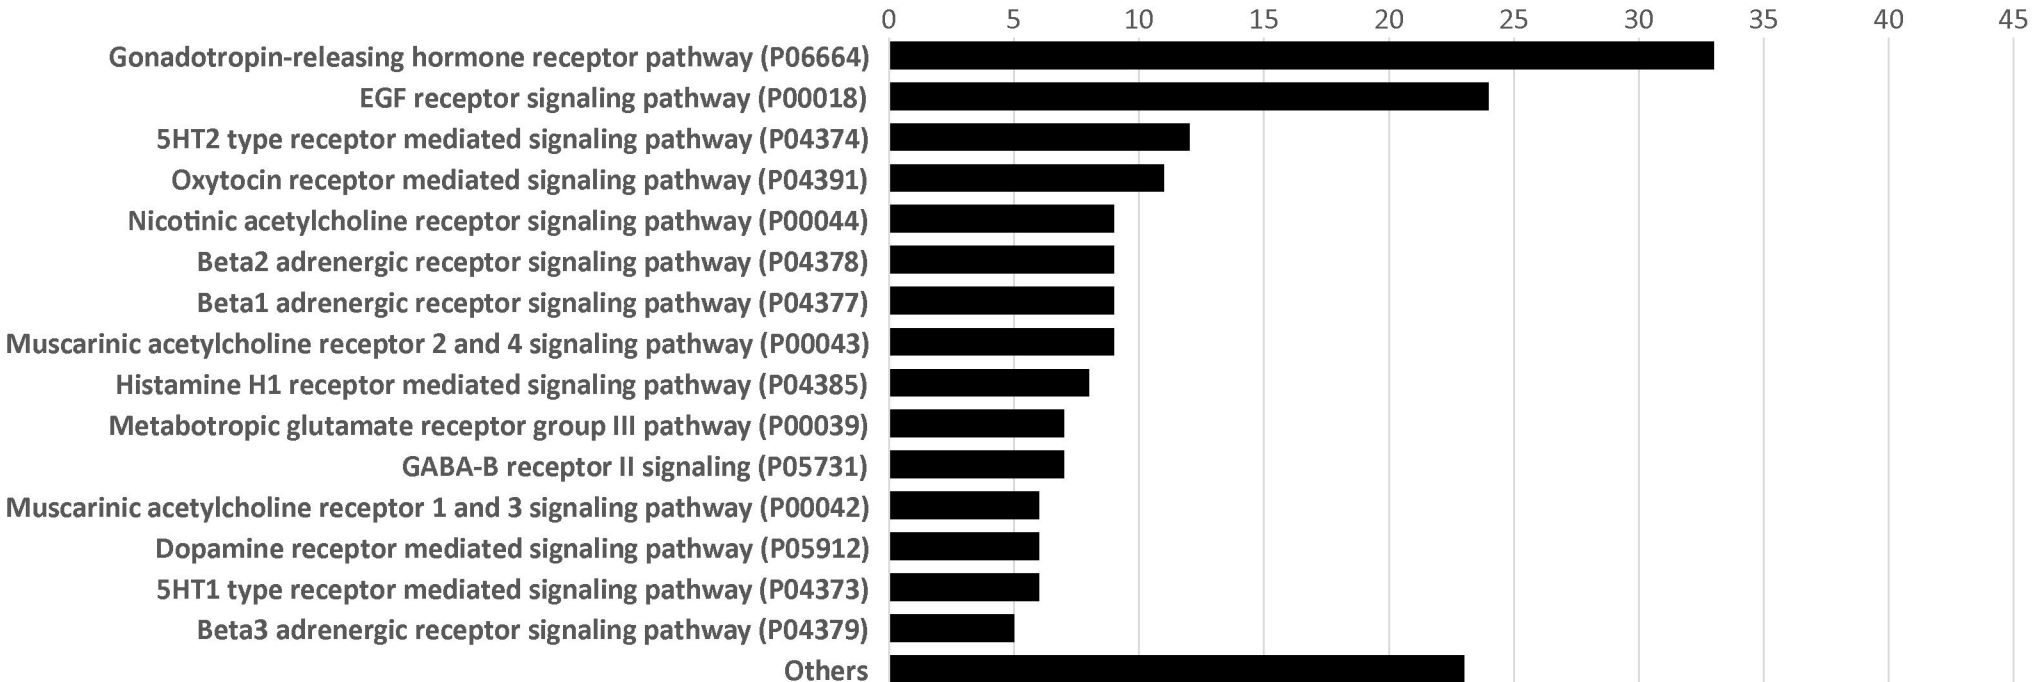

D

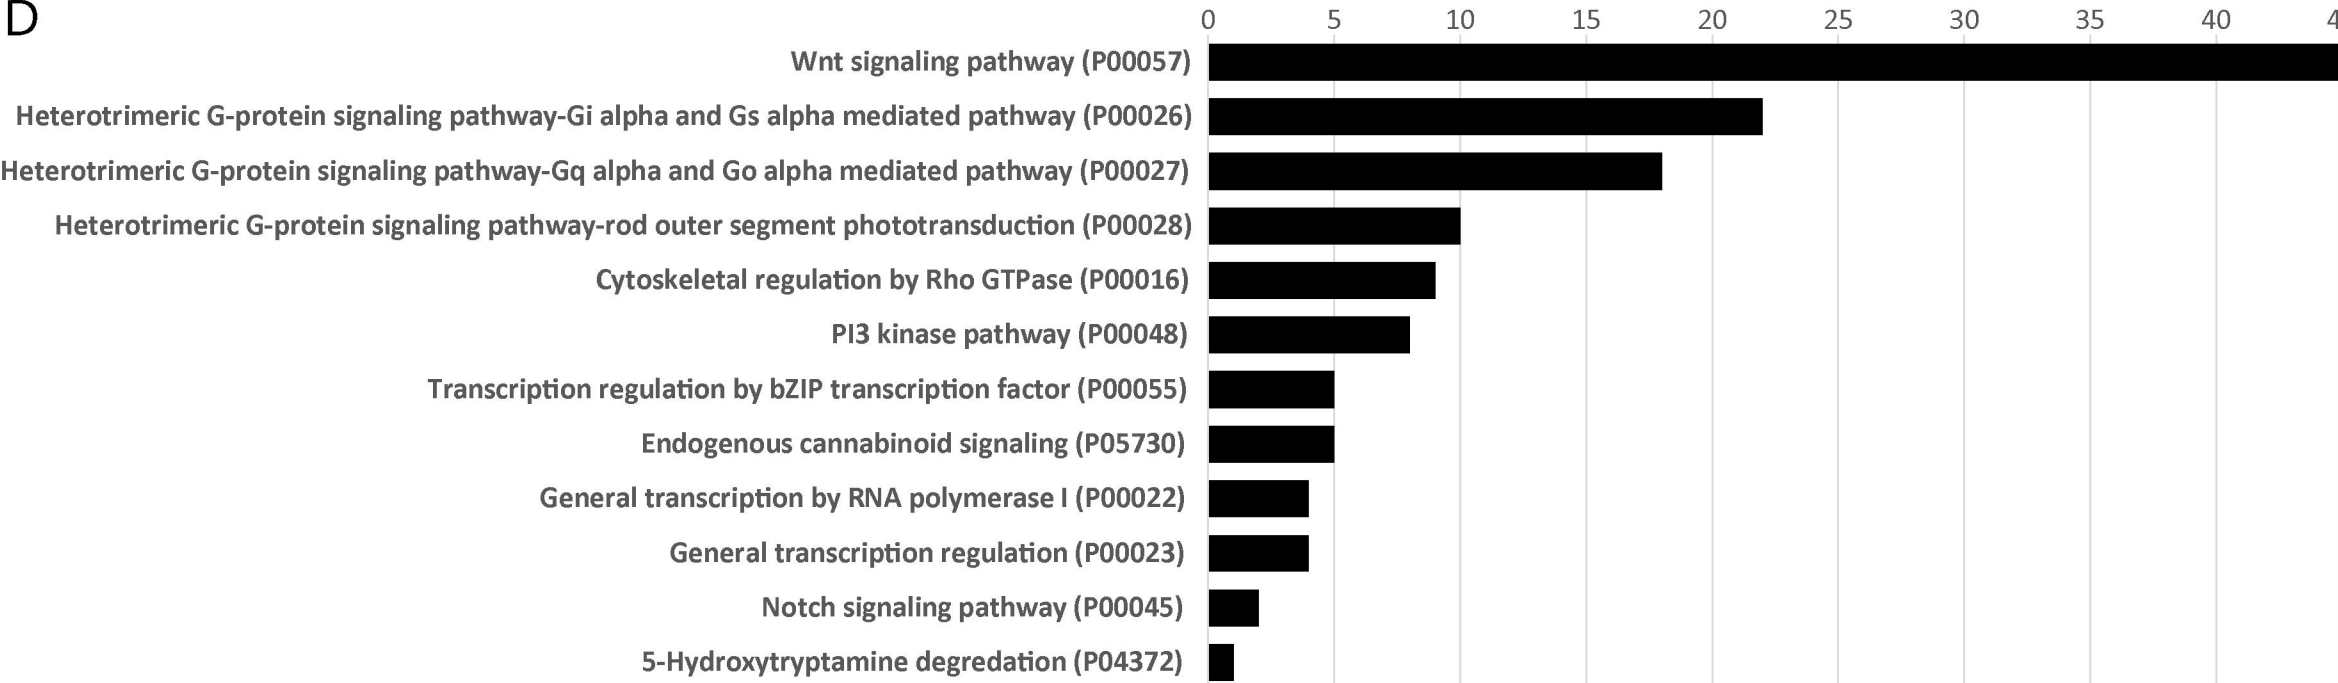

Source: http://biorxiv.org/content/10.1101/128629v1.full.pdf
